# Supplementary material for: Sickness absence and disability pension before and after first childbirth and in nulliparous women: longitudinal analyses of three cohorts in Sweden
Source: PubMed Central journal article supplement — BMJ Open. 2019 Sep 8;9(9):e031593. doi: 10.1136/bmjopen-2019-031593 (PMC6738681; doi:10.1136/bmjopen-2019-031593), 2019-09-08
Supplement: bmjopen-2019-031593.draft_revisions.pdf [file bmjopen-2019-031593.draft_revisions.pdf]

# BMJ Open

BMJ Open is committed to open peer review. As part of this commitment we make the peer review history of every article we publish publicly available.

When an article is published we post the peer reviewers' comments and the authors' responses online. We also post the versions of the paper that were used during peer review. These are the versions that the peer review comments apply to.

The versions of the paper that follow are the versions that were submitted during the peer review process. They are not the versions of record or the final published versions. They should not be cited or distributed as the published version of this manuscript.

BMJ Open is an open access journal and the full, final, typeset and author-corrected version of record of the manuscript is available on our site with no access controls, subscription charges or pay-per-view fees (<http://bmjopen.bmj.com>).

If you have any questions on BMJ Open's open peer review process please email [info.bmjopen@bmj.com](mailto:info.bmjopen@bmj.com)

# BMJ Open

## Sickness absence and disability pension in relation to first childbirth: three cohorts of women in Sweden

|                               |                                                                                                                                                                                                                                                                                                                                                                                                                                                                  |
|-------------------------------|------------------------------------------------------------------------------------------------------------------------------------------------------------------------------------------------------------------------------------------------------------------------------------------------------------------------------------------------------------------------------------------------------------------------------------------------------------------|
| Journal:                      | <i>BMJ Open</i>                                                                                                                                                                                                                                                                                                                                                                                                                                                  |
| Manuscript ID                 | bmjopen-2019-031593                                                                                                                                                                                                                                                                                                                                                                                                                                              |
| Article Type:                 | Research                                                                                                                                                                                                                                                                                                                                                                                                                                                         |
| Date Submitted by the Author: | 10-May-2019                                                                                                                                                                                                                                                                                                                                                                                                                                                      |
| Complete List of Authors:     | Björkenstam, Charlotte; Karolinska Institute<br>Orellana, Cecilia; Karolinska Institutet<br>Laszlo, Krisztina; Karolinska Institutet, Department of Public Health Sciences<br>Svedberg, Pia; Karolinska Institutet, Department of Clinical Neuroscience<br>Voss, Margarethe; Karolinska Institutet<br>Lidwall, Ulrik; Karolinska Institutet<br>Lindfors, Petra; Stockholm University, Department of Psychology<br>Alexanderson, Kristina; Karolinska Institutet, |
| Keywords:                     | sick leave, disability pension, childbirth, cohort study, pregnancy, child delivery                                                                                                                                                                                                                                                                                                                                                                              |
|                               |                                                                                                                                                                                                                                                                                                                                                                                                                                                                  |

SCHOLARONE™  
Manuscripts

1  
2  
3 **Sickness absence and disability pension in relation to first**  
4  
5  
6 **childbirth: three cohorts of women in Sweden**  
7  
8  
9  
10  
11  
12  
13

14 Charlotte Björkenstam<sup>1</sup>, Cecilia Orellana<sup>2</sup>, Krisztina D. László<sup>1,3</sup>, Pia Svedberg<sup>1</sup>, Margaretha  
15 Voss<sup>1</sup>, Ulrik Lidwall<sup>1,4</sup>, Petra Lindfors<sup>5</sup>, Kristina Alexanderson<sup>1</sup>  
16  
17  
18  
19  
20

21 <sup>1</sup>Division of Insurance Medicine, Department of Clinical Neuroscience, Karolinska Institutet,  
22 Stockholm, Sweden  
23  
24

25 <sup>2</sup>Unit of Occupational Medicine, Institute of Environmental Medicine, Karolinska Institutet,  
26 Stockholm, Sweden  
27  
28

29 <sup>3</sup>Department of Public Health Sciences, Karolinska Institutet, Stockholm, Sweden  
30  
31

32 <sup>4</sup>Department for Analysis and Forecast, Swedish Social Insurance Agency, Stockholm,  
33 Sweden  
34  
35

36 <sup>5</sup>Department of Psychology, Stockholm University, Stockholm, Sweden  
37  
38  
39  
40  
41  
42

43 Correspondence to: Krisztina László  
44

45 Division of Insurance Medicine, Department of Clinical Neuroscience, Karolinska Institutet,  
46 SE-171 77 Stockholm, Sweden  
47  
48

49 E-mail: [krisztina.laszlo@ki.se](mailto:krisztina.laszlo@ki.se); Telephone: +46730209761.  
50  
51  
52  
53  
54  
55  
56

57 Word count for the text: 3003  
58  
59  
60

## ABSTRACT

**Objective** Childbirth is suggested to be associated with elevated levels of sickness absence (SA) and disability pension (DP). However, detailed knowledge about SA/DP patterns is limited. We aimed to compare SA/DP across different periods among women according to their childbirth status.

**Design** Register-based cohort study.

**Setting** Sweden.

**Participants** We analysed three population-based cohorts of women aged 18-39 years and living in Sweden 31 December 1994, 1999, or 2004.

**Primary and secondary outcome measures** Annual mean combined SA>14 and DP days.

**Methods** We compared crude and standardized annual mean net days of SA and DP during the three years preceding and the three years after first childbirth, among women having (1) their first and only birth during the subsequent three years, (2) their first birth and at least another delivery and (3) no childbirths before, nor during the study period.

**Results** Despite an increase in SA in the year preceding the first childbirth, women who gave birth, and especially women with multiple births, tended to have lower levels of combined SA/DP days throughout the years than women without childbirths. SA/DP across groups varied with age; young women (18-24 years) without childbirths had fewer SA days but more DP days than young women with multiple childbirths, regardless of year.

**Conclusions** Women with more than one childbirth had lower proportions and fewer days of both SA and DP, as compared to women with one childbirth and to women having no births. Further, women who did not give birth had markedly more DP days. Thus, childbirth does not seem to be associated with higher levels of SA and DP.

**Key words** Sick leave, disability pension, childbirth, cohort study, postpartum, pregnancy, child delivery

**Strengths and limitations of this study**

- In this exploratory population-based study using three cohorts from different time periods, we compared trends in sickness absence and disability pension in the years before and after first childbirth among women with one or more childbirths and among women with no childbirth; this study design allowed us to consider health selection into childbirth and cohort effects.
- Further strengths of our study include the large sample size, the nationwide data, the longitudinal design, the high quality of information on childbirth and sickness absence and disability pension and the high employment rate of women in Sweden.
- The main limitation is that we had no information on sickness absence spells shorter than 15 days.

## BACKGROUND

In many countries with high labor force participation of women, women have higher levels of sickness absence (SA) and disability pension (DP) than men [1-4]. One suggestion to explain this gender difference focuses on SA during pregnancy and after childbirth [5-8]. Also for DP, pregnancy has been suspected to be a factor behind this gender gap, although findings are less consistent than for SA [8]. Swedish studies have shown that women have higher SA during pregnancy, as well as during the years following childbirth, as compared to other years [5 6 9 10]. Yet, it is unclear whether women have elevated rates of SA in the years before their first childbirth. Findings from twin studies, have shown that women who gave birth had lower average number of SA days compared with their nulliparous twin sisters [5 10 11]. After delivery the average number of SA days were similar in both groups. However, few studies have focused on SA and DP in different groups of women; most have focused on differences between women and men.

Pregnancy and the postpartum period are characterized by important alterations in endocrine, metabolic, immune, and cardiovascular function [12 13]. Changes in immunity in pregnancy may result in higher maternal susceptibility to certain common infectious diseases and in diminished immune responses. This could lead to more severe disease courses in pregnancy, than in the non-pregnant state and consequently to longer SA spells. Similarly, while women's conditions with certain autoimmune diseases improve during pregnancy and may deteriorate after delivery, for others there is a deterioration or no change during gestation [14]. Also, women with a genetic vulnerability or certain risk factors, may experience pregnancy induced hypertension/preeclampsia, gestational diabetes, peri- and postpartum thrombotic events, or peri- and postpartum psychiatric disorders. Several of these conditions reverse shortly after delivery/the postpartum period, but may reappear later in vulnerable women and result in SA or DP [13].

1  
2  
3 As for SA, a Norwegian study found that the higher SA risk in women in the years after  
4 pregnancy disappeared when SA during subsequent pregnancies were accounted for [15].  
5

6  
7 However, this study included mothers only and no information on DP was included, which  
8 means that long-term or permanent reductions in work capacity was not accounted for.  
9

10  
11 The mean age for first childbirth, and the prevalence of several maternal chronic diseases, of  
12 obesity, and in vitro fertilization has increased over the decades, which may contribute to an  
13 increase in rates of certain complications related to pregnancy and childbirth [6 16 17] and  
14 subsequently higher SA rates during and shortly after pregnancy.  
15  
16

17  
18 It has also been argued that the combination of paid and unpaid work is one reason why  
19 women have higher levels of SA. The notion that the load of combining different roles might  
20 increase SA in women is supported by some studies [18-20]. However, other findings have  
21 reported a positive association between multiple roles and health and well-being, respectively  
22 [21 22]. One exception is single mothers, for whom SA/DP levels are higher than for married  
23 and cohabiting mothers, and for whom SA/DP levels increases with the number of children  
24 [23].  
25  
26

27  
28 Nevertheless, there might also be a positive health selection into giving birth, where women  
29 not giving birth may have poorer health and thus are unable to, or choose not to deliver a child  
30 [5 10 11]. However, with these studies having included twins only, the generalizability to the  
31 general population is unclear.  
32  
33

34  
35 Our aim was to gain knowledge on SA and DP over time in women, in relation to childbirth  
36 while accounting for period effects. Specifically, we wanted to compare annual mean net days  
37 of SA and DP among women giving and not giving birth, covering a period of three years  
38 before and after childbirth. As both childbirth and age are associated with socioeconomic  
39 position, another aim was to examine if the relationship between childbirth and SA/DP varied  
40  
41  
42  
43  
44  
45  
46  
47  
48  
49  
50  
51  
52  
53  
54  
55  
56  
57  
58  
59  
60

1  
2  
3 between age groups. Finally, we aimed to analyze possible period and cohort effects, by  
4 including three cohorts.  
5  
6  
7  
8  
9  
10  
11

## 12 **METHODS**

13  
14 Longitudinal population-based cohort studies were conducted. We created three different  
15 population-based cohorts, using the unique personal identity number assigned to all Swedish  
16 residents for linkage of microdata from five Swedish nationwide registers, from the following  
17 three authorities [24]:  
18  
19  
20  
21  
22

23 - From Statistics Sweden: The Longitudinal Integration Database for Health Insurance and  
24 Labor Market Studies (LISA) regarding sociodemographic information, year of immigration,  
25 and emigration.  
26  
27  
28  
29

30 - From the National Board of Health and Welfare: 1) The Medical Birth Register (MBR) for  
31 dates of childbirth and parity. This register covers 97-99% of all births in Sweden since 1973  
32 [17]; 2) the National In-Patient Register for information since 1964 on childbirths not found  
33 in the MBR [25]. We used main or secondary diagnoses related to childbirth (as defined by  
34 the International Classification of Disease (ICD): ICD-7: 660, 670-678; ICD-8: 650-662;  
35 ICD-9: 650, 651, 652, 659X, W/659.W-659.X, 669.E,F,G,H,W,X; ICD-10:O75.7-O75.9,  
36 O80-84). If a delivery appeared in both registers, the date from the MBR was used. 3) The  
37 Causes of Death Register for date of death.  
38  
39  
40  
41  
42  
43  
44  
45  
46  
47

48 - From the Swedish Social Insurance Agency, information from their register Micro Data for  
49 Analysis of Social Insurance (MiDAS) on SA and DP (start and end dates and extent) for the  
50 period 1994-2008 [26]. Only SA spells >14 days were included.  
51  
52  
53  
54

55 In Sweden, all individuals aged 16 years or older and in gainful employment or income  
56 benefits, are entitled to sickness benefits from the public sickness insurance system, if unable  
57  
58  
59  
60



1  
2  
3 to work due to disease or injury. For employees, sick pay is typically paid by the employer  
4 during the first 14 days of an SA spell. DP can be granted residents in Sweden aged 19-64  
5  
6  
7 who, due to disease or injury, have a permanently reduced work capacity. Both SA and DP  
8  
9  
10 can be granted for full- or part-time (25%, 50% or 75%) of ordinary work hours.

11  
12 Approximately 80% of the lost income, up to a certain limit, is covered by SA benefits, while  
13  
14  
15 DP covers up to 65%.

### 16 17 18 19 **Cohorts**

20  
21 We created three cohorts (Cohort1995, Cohort2000, Cohort2005) of all women living in  
22  
23 Sweden and aged 18-39 years 31 December 1994, 1999, or 2004, respectively, using the  
24  
25 LISA register. To study SA and DP during the three years prior to three years after first child  
26  
27 delivery date, and to allow comparisons with women not having any births during this period,  
28  
29 we only included women who resided in Sweden during the three years prior to the respective  
30  
31 inclusion year. For each cohort, we identified three groups of women:

- 32  
33 • B0: Women having no childbirths registered neither before nor during the follow-up.
- 34  
35 • B1: Women having their first childbirth during the index year and no additional births  
36  
37 registered during the follow-up.
- 38  
39 • B1+: Women having their first childbirth during the index year and at least one more  
40  
41 birth during the follow-up.

42  
43 Thus, all women with a childbirth prior to the index year (1995, 2000, or 2005) were  
44  
45 excluded. Each woman was followed for three years after the delivery date ( $T_0$ ); for the  
46  
47 women in B0,  $T_0$  was set to 2 July of each index year. To avoid that the outcome (SA/DP)  
48  
49 was influenced by a new pregnancy, any women in the three exposure groups (B0, B1, B1+)  
50  
51 having a childbirth in the 43 weeks after  $Y_{+3}$  (the third follow-up year) was excluded.  
52  
53  
54  
55  
56  
57  
58  
59  
60

## Outcome

We calculated the number of annual mean net SA and DP days for each of the three years preceding  $T_0$  and the three years after, for each cohort, respectively. However, as data on SA and DP was only available from 1994, only one year prior to  $T_0$  was considered for Cohort1995. Part-time SA/DP days were combined, e.g., two days of half-time SA or DP was counted as one net day.

## Sociodemographics

The following covariates were included: age (categorized into four groups: 18-24, 25-29, 30-34, and 35-39 years), country of birth (Sweden, other Scandinavian country, other EU 25, and rest of the world), type of living area (based on the H-classification scheme [20]), categorized as: large city (Stockholm, Gothenburg, Malmö); medium-sized city ( $\geq 90,000$  inhabitants); and small city/village ( $< 90,000$  inhabitants)), family situation (married/cohabitant and single), and educational level (categorized as elementary ( $\leq 9$  years), high school (10–12 years), and university/college ( $> 12$  years)). These variables were obtained from the LISA register and were measured on 31 December 1994, 1999, and 2004, respectively.

## Statistical analyses

We calculated annual mean numbers of net SA and DP days, starting three years preceding the date of the first childbirth ( $Y_{-3}$ ) until three years after ( $Y_{+3}$ ) for the three comparisons groups (B0, B1, B1+) within each cohort. Both crude and standardized mean numbers of net days were calculated. We used a direct standardization using Cohort2005 as the standard population. In the standardization, all sociodemographic variables were taken into account; age (in four categories), country of birth, place of residence, educational level, and family

1  
2  
3 status (as binary). Women who died or emigrated within three years after child delivery were  
4  
5 excluded from the analyses from the year after death or emigration.  
6

7  
8 Further, for Cohort2005, we calculated the proportion of all women who had DP or at least  
9  
10 one SA spell >14 days, respectively, and also the proportion of women with SA among those  
11  
12 who had no DP.  
13

14  
15 As age is strongly associated with both SA/DP and childbirth [6], we also performed analyses  
16  
17 stratified by age for Cohort2005, calculating 95% confidence intervals (CI) for the means of  
18  
19 the sums of SA and DP net days. All analyses were conducted using SAS 9.4.  
20

21  
22 The project was approved by the Regional Ethical Review Board in Stockholm, Sweden.  
23  
24  
25

### 26 **Patient and public involvement**

27  
28 The study participants or the general public were not involved in decisions about the research  
29  
30 question, the design of the study, the outcomes, the conduct of the study, the drafting of the  
31  
32 paper, nor in the dissemination of the study results.  
33  
34  
35  
36  
37  
38  
39

## 40 **RESULTS**

41  
42  
43 In all three cohorts, 92 to 93% of the women had no childbirths, that is, they belonged to the  
44  
45 group B0 (Table 1). Around 13,000 to 15,000 women had had their first childbirth during the  
46  
47 index year (3%) but no more births during the study period, i.e., belonged to group B1. About  
48  
49 21,000 to 25,000 women belonged to B1+, i.e., had their first delivery during the index year  
50  
51 and at least one additional childbirth during follow-up (4-5%). Women in B0 were younger  
52  
53 (18-24 years), had lower educational level, and were to a higher extent single. A lower rate of  
54  
55 women in B1+ were in the oldest age group (i.e., 35-39 years), as compared to women in B0  
56  
57  
58  
59  
60

1  
2  
3 and B1. Furthermore, women in group B1+ were more likely to have higher education and to  
4  
5 be married or cohabiting, than those in B0 and B1.  
6

7  
8 For Cohort2005, women in B1 had the highest proportion of SA/DP combined during  $Y_{-3}$  to  
9  
10  $Y_{-1}$ , as well as the highest proportion of SA between  $Y_{-3}$  to  $Y_{+1}$ , while B1+ had both highest  
11  
12 proportion of SA/DP combined and SA the other years (Table 2). The highest proportion of  
13  
14 DP was found for B0 during all years, ranging from 3.4% to 5.8%.  
15  
16  
17  
18  
19  
20  
21  
22  
23  
24  
25  
26  
27  
28  
29  
30  
31  
32  
33  
34  
35  
36  
37  
38  
39  
40  
41  
42  
43  
44  
45  
46  
47  
48  
49  
50  
51  
52  
53  
54  
55  
56  
57  
58  
59  
60

**Table 1.** Characteristics of the three cohorts of women, by cohort and childbirth group<sup>1</sup>.

|                            | Cohort1995      |                 |                  | Cohort2000    |              |              | Cohort2005    |              |              |
|----------------------------|-----------------|-----------------|------------------|---------------|--------------|--------------|---------------|--------------|--------------|
|                            | N (%)           |                 |                  | N (%)         |              |              | N (%)         |              |              |
|                            | B0 <sup>1</sup> | B1 <sup>1</sup> | B1+ <sup>1</sup> | B0            | B1           | B1+          | B0            | B1           | B1+          |
| N                          | 450630 (100)    | 15096 (100)     | 20902 (100)      | 455962 (100)  | 13569 (100)  | 21347 (100)  | 453532 (100)  | 14299 (100)  | 24673 (100)  |
| <b>Age (years)</b>         |                 |                 |                  |               |              |              |               |              |              |
| 18-24                      | 261574 (58.1)   | 5464 (36.2)     | 7385 (35.3)      | 252830 (55.4) | 3982 (29.4)  | 5475 (25.6)  | 257219 (56.7) | 3688 (25.8)  | 5284 (21.4)  |
| 25-29                      | 89766 (19.9)    | 5360 (35.5)     | 9139 (43.7)      | 98418 (21.6)  | 4890 (36.0)  | 9864 (46.2)  | 92672 (20.4)  | 4593 (32.1)  | 10354 (42.0) |
| 30-34                      | 53627 (11.9)    | 3030 (20.1)     | 3698 (17.7)      | 56477 (12.4)  | 3309 (24.4)  | 5076 (23.8)  | 56233 (12.4)  | 4089 (28.6)  | 7614 (30.9)  |
| 35-39                      | 45663 (10.1)    | 1242 (8.2)      | 680 (3.3)        | 48237 (10.6)  | 1388 (10.2)  | 932 (4.4)    | 47408 (10.5)  | 1929 (13.5)  | 1421 (5.8)   |
| <b>Country of birth</b>    |                 |                 |                  |               |              |              |               |              |              |
| Sweden                     | 408043 (90.5)   | 1374 (91.1)     | 19649 (94.0)     | 405643 (89.0) | 11961 (88.2) | 19850 (93.0) | 397091 (87.6) | 12388 (86.6) | 22583 (91.5) |
| Other Scandinavian country | 9802 (2.2)      | 397 (2.6)       | 347 (1.7)        | 6404 (1.4)    | 232 (1.7)    | 251 (1.2)    | 4873 (1.1)    | 200 (1.4)    | 237 (1.0)    |
| Other EU 25                | 7229 (1.6)      | 193 (1.3)       | 166 (0.8)        | 6904 (1.5)    | 180 (1.3)    | 166 (0.8)    | 7432 (1.6)    | 213 (1.5)    | 242 (1.0)    |
| Rest of the world          | 25556 (5.7)     | 752 (5.0)       | 740 (3.5)        | 37011 (8.1)   | 1196 (8.8)   | 1080 (5.0)   | 44136 (9.7)   | 1498 (10.5)  | 1611 (6.5)   |
| <b>Type of living area</b> |                 |                 |                  |               |              |              |               |              |              |
| Large cities               | 188004 (41.7)   | 5986 (39.7)     | 7741 (37.0)      | 197319 (43.3) | 5641 (41.6)  | 8837 (41.4)  | 196911 (43.4) | 6260 (43.8)  | 10882 (44.1) |
| Medium-sized cities        | 157282 (34.9)   | 5273 (34.9)     | 7398 (35.4)      | 159901 (35.1) | 4688 (34.5)  | 7305 (34.2)  | 161919 (35.7) | 4824 (33.7)  | 8425 (34.2)  |
| Small cities               | 105344 (23.4)   | 3837 (25.4)     | 5763 (27.6)      | 98742 (21.7)  | 3240 (23.9)  | 5205 (24.4)  | 94702 (20.9)  | 3215 (22.5)  | 5366 (21.8)  |
| <b>Educational level</b>   |                 |                 |                  |               |              |              |               |              |              |
| Elementary                 | 87363 (19.4)    | 2305 (15.3)     | 1923 (9.2)       | 99867 (21.9)  | 2506 (18.5)  | 2055 (9.6)   | 90510 (20.0)  | 1815 (12.7)  | 1757 (7.1)   |
| High school                | 257971 (57.2)   | 9055 (60.0)     | 11972 (57.3)     | 225774 (49.5) | 7148 (52.7)  | 10263 (48.1) | 208184 (45.9) | 6751 (47.2)  | 9516 (38.6)  |
| University                 | 105296 (23.4)   | 3736 (24.7)     | 7007 (33.5)      | 130321 (28.6) | 3915 (28.8)  | 9029 (42.3)  | 154838 (34.1) | 5733 (40.1)  | 13400 (54.3) |
| <b>Family situation</b>    |                 |                 |                  |               |              |              |               |              |              |
| Married or cohabitant      | 26986 (6.0)     | 3317 (22.0)     | 6002 (28.7)      | 23187 (5.1)   | 3026 (22.3)  | 6228 (29.2)  | 20295 (4.5)   | 3212 (22.5)  | 6843 (27.7)  |
| Single                     | 423644 (94.0)   | 11779 (78.0)    | 14900 (71.3)     | 432775 (94.9) | 10543 (77.7) | 15119 (70.8) | 433237 (95.5) | 11087 (77.5) | 17830 (72.3) |

<sup>1</sup>B0= No childbirth, B1=First childbirth during index year (at date T<sub>0</sub>) of each cohort and no more children during follow-up, B1+= First childbirth at T<sub>0</sub> and at least one more during follow-up.

**Table 2.** Proportion of women with a sickness absence (SA) spell >14 days and disability pension (DP) during the six different years before and after childbirth, for Cohort2005, by childbirth group

| Year             | Childbirth group | Total study population |                        |                     | Of DP recipients, received DP |                      | Of SA recipients, received SA for a period of |                |                 |                  |               |
|------------------|------------------|------------------------|------------------------|---------------------|-------------------------------|----------------------|-----------------------------------------------|----------------|-----------------|------------------|---------------|
|                  |                  | N                      | SA/DP <sup>1</sup> (%) | DP <sup>1</sup> (%) | SA <sup>2</sup> (%)           | Part of the year (%) | All year (%)                                  | >0-30 days (%) | >30-90 days (%) | >90-180 days (%) | >180 days (%) |
| Y-3              | B0               | 453532                 | 9.5                    | 3.4                 | 6.6                           | 26.8                 | 73.2                                          | 40.0           | 22.8            | 13.6             | 23.6          |
|                  | B1               | 14299                  | 12.6                   | 1.4                 | 11.6                          | 53.8                 | 46.2                                          | 43.1           | 22.6            | 14.9             | 19.4          |
|                  | B1+              | 24673                  | 8.9                    | 0.5                 | 8.6                           | 63.4                 | 36.6                                          | 51.0           | 24.0            | 12.7             | 12.3          |
| Y-2              | B0               | 453532                 | 9.5                    | 3.9                 | 6.2                           | 24.3                 | 75.7                                          | 34.2           | 23.3            | 14.8             | 27.7          |
|                  | B1               | 14299                  | 12.7                   | 2.0                 | 11.4                          | 52.8                 | 47.2                                          | 40.8           | 22.3            | 14.1             | 22.8          |
|                  | B1+              | 24673                  | 8.6                    | 0.7                 | 8.1                           | 60.9                 | 39.1                                          | 45.7           | 25.5            | 13.8             | 14.9          |
| Y-1              | B0               | 453532                 | 10.3                   | 4.5                 | 6.5                           | 25.5                 | 74.5                                          | 36.3           | 23.6            | 15.3             | 24.8          |
|                  | B1               | 14299                  | 36.2                   | 2.4                 | 35.0                          | 44.7                 | 55.3                                          | 37.8           | 36.9            | 15.8             | 9.5           |
|                  | B1+              | 24673                  | 30.6                   | 0.8                 | 30.2                          | 50.8                 | 49.2                                          | 45.4           | 35.8            | 13.3             | 5.6           |
| Y+1              | B0               | 453532                 | 11.1                   | 5.0                 | 6.9                           | 25.5                 | 74.5                                          | 41.1           | 23.2            | 13.9             | 21.9          |
|                  | B1               | 14299                  | 10.7                   | 2.4                 | 8.7                           | 36.2                 | 63.8                                          | 61.5           | 22.5            | 8.4              | 7.7           |
|                  | B1+              | 24673                  | 6.8                    | 0.8                 | 6.1                           | 49.7                 | 50.3                                          | 67.9           | 20.2            | 6.5              | 5.4           |
| Y+2 <sup>3</sup> | B0               | 448921                 | 11.8                   | 5.4                 | 7.3                           | 26.5                 | 73.5                                          | 43.1           | 22.6            | 13.7             | 20.6          |
|                  | B1               | 14270                  | 10.7                   | 2.6                 | 8.7                           | 37.1                 | 62.9                                          | 44.1           | 21.5            | 14.1             | 20.3          |
|                  | B1+              | 24671                  | 15.1                   | 0.8                 | 14.5                          | 45.4                 | 54.6                                          | 50.4           | 33.4            | 11.7             | 4.6           |
| Y+3 <sup>3</sup> | B0               | 443320                 | 12.0                   | 5.8                 | 7.1                           | 27.1                 | 72.9                                          | 43.7           | 23.1            | 13.2             | 20.0          |
|                  | B1               | 14183                  | 12.7                   | 2.9                 | 10.6                          | 43.0                 | 57.0                                          | 44.7           | 20.9            | 13.2             | 21.1          |
|                  | B1+              | 24667                  | 19.1                   | 0.8                 | 18.5                          | 47.5                 | 52.5                                          | 50.8           | 34.7            | 11.0             | 3.5           |

<sup>1</sup>Having DP was defined as  $1 \leq \text{DP net annual days} \leq 364$ . <sup>2</sup>SA spell >14 days after excluding those with full-time DP. <sup>3</sup>Numbers of women in Y<sub>+2</sub> and Y<sub>+3</sub> are lower due to the fact that some died or emigrated during these years.

1  
2  
3 Comparing crude annual mean net SA and DP days, we found a similar pattern regardless of  
4 cohort (Figure 1). Group B0 had the highest mean SA/DP days combined, followed by group  
5  
6  
7 B1 and group B1+. The only exception to this was year  $Y_{-1}$ , that is the year of the first  
8  
9 pregnancy for B1 and B1+, when group B0 had the lowest crude number of combined SA and  
10  
11 DP days. During all years, the largest difference was found in DP days, where women with no  
12  
13  
14  
15  
16  
17  
18  
19  
20  
21  
22  
23  
24  
25  
26  
27  
28  
29  
30  
31  
32  
33  
34  
35  
36  
37  
38  
39  
40  
41  
42  
43  
44  
45  
46  
47  
48  
49  
50  
51  
52  
53  
54  
55  
56  
57  
58  
59  
60

The standardized mean number of combined SA/DP days showed similar patterns for the  
three different cohorts (Figure 2). Women with no childbirths (B0) had the highest number of  
SA/DP days at all years except at  $Y_{-1}$ , when B1 had the highest number of SA/DP days,  
followed by group B1+. Also for standardized number of days, the largest differences were  
seen for DP. Regardless of year, women in B0 had three to ten times more DP days than did  
the other groups. SA days were more evenly spread. In Cohort2005 during  $Y_{-3}$  and  $Y_{-2}$  group  
B0 and group B1 had similar number of mean SA days (11.3; 10.9 and 11.6; 11.6,  
respectively). Women with at least one additional childbirth had fewer mean SA days, 7.0 and  
7.5 SA days at  $Y_{-3}$  and  $Y_{-2}$ . The pattern for the association between childbirth and SA/DP was  
largely similar across cohorts. There was also an increase in SA and DP over time in all  
groups.

In the age-stratified analyses for Cohort2005, we found that the youngest women (18-24  
years) in B1 had the highest mean SA and DP days, whereas B0 women had the lowest mean  
number of corresponding days (Figure 3). Still, B0 women had slightly more DP days,  
regardless of year. In the other age groups, B0 women had most DP days during all years, as  
compared with B1 and B1+, while women in B1+ had lowest number of SA days during all  
years, except during  $Y_{-1}$ .

1  
2  
3 Women aged 30-39 in B0 had the highest mean SA and DP days, regardless of year. Their  
4  
5 combined mean number of SA/DP days varied between 50 and 60, whereas the range was 30-  
6  
7 40 in group B1 and 8-25 in B1+.  
8  
9

## 10 11 12 13 **DISCUSSION**

14  
15  
16 In this exploratory population-based study using three cohorts from different time periods, we  
17  
18 found that women who had no childbirths had up to ten times higher rates of DP than their  
19  
20 counterparts who gave at least one birth, regardless of cohort and year studied. Women  
21  
22 having one additional, subsequent childbirth during follow-up, tended to have fewer days of  
23  
24 combined SA and DP, than women having no childbirths. The findings suggest no period  
25  
26 effects regarding the linkages between childbirth and the investigated outcomes.  
27  
28

29  
30 Our finding that women with no childbirths had higher levels of DP is in line with those of a  
31  
32 Swedish study of twins up to ten years after childbirth, which reported that the number of DP  
33  
34 days was significantly higher in women not giving birth than in their twin sisters who did  
35  
36 [10]. Further, this twin study found that except for the year of childbirth, the number of mean  
37  
38 annual SA days (including spells >14 days) was similar among women giving birth and those  
39  
40 who did not. Our study showed similar results, except that women who had more than one  
41  
42 childbirth had slightly fewer mean SA days, than the other two groups of women.  
43  
44

45  
46 Women with poor health or other characteristics associated with adverse health may decide  
47  
48 against going through a pregnancy [19 21]. This may be part of the explanation for the  
49  
50 substantially higher levels of DP among women with no childbirths in our study, i.e., a  
51  
52 positive health selection into giving birth, or into having more than one birth is likely, as has  
53  
54 been suggested by others [10]. However, with improvements in medical care, more women  
55  
56 with severe diseases who earlier had to refrain from pregnancy due to disease, might now  
57  
58  
59  
60



1  
2  
3 choose otherwise. In line with the above mentioned results, another Swedish twin study also  
4 indicated a health selection into giving birth [11]. It also emphasized their findings regarding  
5 multiple hospitalizations before subsequent DP.  
6  
7  
8

9  
10 In our study, women aged 30 years or more, with no childbirths, had higher mean SA days  
11 than those with one or more childbirths. Mean number of DP days were higher in all age  
12 groups among women with no childbirths.  
13  
14

15  
16 We found that women having a subsequent childbirth during the follow-up (B1+), had fewer  
17 days of both SA and DP up until  $Y_{+2}$  when the levels became very similar, as compared to the  
18 other groups. The most plausible explanation for this is SA due to their subsequent pregnancy.  
19  
20  
21 This is in accordance with a Norwegian study reporting that the higher SA risk in women in  
22 the years after pregnancy disappeared, when SA during subsequent pregnancies were  
23 accounted for [15].  
24  
25  
26  
27  
28  
29

30  
31 When we analyzed period effects, our results indicated similar patterns between the three  
32 exposure groups regardless of cohort. Nevertheless, the levels of SA/DP combined increased  
33 in a graded manner from Cohort1995 to Cohort2000 and was highest in Cohort2005.  
34  
35  
36

37  
38 The strengths of this study include its population-based and longitudinal design, and the use  
39 of high-quality and nationwide register data with high completeness, validity and no drop-  
40 outs [24]. The use of National Patient Register data in addition to the MBR allowed us to  
41 include childbirths not captured by the MBR. Furthermore, we were able to account for  
42 factors related both to the occurrence of SA/DP and childbirth such as maternal age,  
43 educational level, and type of living area, by means of a standardized analysis taking these  
44 variables into account. Another strength is related to characteristics of the Swedish labor  
45 market and public insurance system, i.e., high employment rates among women [27] (that is,  
46 low health selection bias) and a public sickness insurance covering basically the whole  
47 population. However, two study limitations warrant consideration in contextualizing the  
48  
49  
50  
51  
52  
53  
54  
55  
56  
57  
58  
59  
60

1  
2  
3 present results. First, women who had only given birth outside of Sweden would not appear in  
4 the registers and may thus, be incorrectly categorized as not having had any childbirth. This  
5  
6 the registers and may thus, be incorrectly categorized as not having had any childbirth. This  
7  
8 may result in differential misclassification of exposure, and biased levels of SA/DP in women  
9  
10 having no childbirths. To mitigate this, and to make sure we had information on their possible  
11  
12 SA/DP, we considered women's residence in Sweden for at least three years prior to  
13  
14 childbirth as an inclusion criterion. We had no information on SA spells <15 days, this can be  
15  
16 considered both a limitation and a strength. The shorter SA spells only represent a limited  
17  
18 number of all SA days, and most are self-reported and not verified by any physician  
19  
20 certificate [28].  
21  
22

23  
24 In conclusion, women who had more than one childbirth had lower rates and fewer days of  
25  
26 both SA and DP, than women with one childbirth only and women not giving birth. Further,  
27  
28 women not giving birth had markedly more DP days. No period effects in the association  
29  
30 between childbirth and these outcomes were detected. High levels of SA and DP among  
31  
32 parous women appear to be mainly restricted to pregnancy. Yet, more research with longer  
33  
34 follow-up periods after childbirth is needed.  
35  
36  
37  
38  
39  
40  
41  
42  
43  
44  
45  
46  
47  
48  
49  
50  
51  
52  
53  
54  
55  
56  
57  
58  
59  
60

1  
2  
3 **Contributors** CB conducted the analyses, wrote the first draft and revised the paper; CO  
4 contributed to analyses and revised the paper; KL contributed to interpretation of the findings  
5 and revised the paper; PS and KA contributed to the conception and design of the study,  
6 interpretation of the findings and revised the paper; MV, UL and PL contributed to the design  
7 of the study, interpretation of the findings and revised the paper. All authors have read and  
8 approved the final version of the manuscript.  
9

10  
11  
12 **Funding** This work was supported by AFA Insurance (grant number 160318). The funder  
13 was not involved in the study design, collection or analysis of the data, interpretation of the  
14 results, writing of the paper nor in decisions about the manuscript submission.  
15  
16

17  
18  
19 **Competing interests** None declared.  
20  
21

22  
23  
24 **Patient consent for publication** Not applicable.  
25  
26

27  
28  
29 **Ethics approval** The study was approved by the Regional Ethical Review Board of Stockholm.  
30  
31

32  
33  
34 **Data sharing statement** No additional data available.  
35  
36  
37  
38  
39  
40  
41  
42  
43  
44  
45  
46  
47  
48  
49  
50  
51  
52  
53  
54  
55  
56  
57  
58  
59  
60

**REFERENCES**

1. Alexanderson K, Norlund A. Swedish Council on Technology Assessment in Health Care (SBU). Chapter 1. Aim, background, key concepts, regulations, and current statistics. *Scandinavian Journal of Public Health* 2004;**32**(Supplement 63):12-30.
2. Parrukoski S, LammiTaskula J. Parental leave policies and the economic crisis in the Nordic countries. Helsinki: National Institute for Health and Welfare, 2012.
3. Svedberg P, Ropponen A, Alexanderson K, et al. Genetic susceptibility to sickness absence is similar among women and men: findings from a Swedish twin cohort. *Twin research and human genetics : the official journal of the International Society for Twin Studies* 2012;**15**(5):642-8 doi: 10.1017/thg.2012.47[published Online First: Epub Date]].
4. Ugreninov E. Can family policy reduce mothers' sick leave absence? A causal analysis of the Norwegian Paternity Leave Reform. *Journal of Family and Economic Issues* 2012
5. Björkenstam E, Alexanderson K, Narusyte J, et al. Childbirth, hospitalisation and sickness absence: a study of female twins. *BMJ Open* 2015;**5**(1):e006033 doi: 10.1136/bmjopen-2014-006033[published Online First: Epub Date]].
6. Brehmer L, Alexanderson K, Schytt E. Days of sick leave and inpatient care at the time of pregnancy and childbirth in relation to maternal age. *Scand J Public Health* 2017;**45**(3):222-29 doi: 10.1177/1403494817693456[published Online First: Epub Date]].
7. Mastekaasa A. Sickness absence in female- and male-dominated occupations and workplaces. *Soc Sci Med* 2005;**60**(10):2261-72 doi: 10.1016/j.socscimed.2004.10.003[published Online First: Epub Date]].
8. Vistnes JP. Gender differences in days lost from work due to illness. *Ind. Labor Relat. Rev.* 1997;**50**(2):304-23.

- 1  
2  
3 9. Kvinnors sjukfrånvaro- En studie av förstagångsföräldrar. [Women's sick leave: a study of  
4 first-time parents] [in Swedish]. Socialförsäkringsrapport, 2014.  
5  
6
- 7  
8 10. Narusyte J, Björkenstam E, Alexanderson K, et al. Occurrence of sickness absence and  
9 disability pension in relation to childbirth: A 16-year follow-up study of 6323 Swedish  
10 twins. Scand J Public Health 2016;**44**(1):98-105 doi:  
11  
12 10.1177/1403494815610051[published Online First: Epub Date]].  
13  
14
- 15  
16 11. Björkenstam E, Narusyte J, Alexanderson K, et al. Associations between childbirth,  
17 hospitalization and disability pension: a cohort study of female twins. PLoS One  
18  
19 2014;**9**(7):e101566 doi: 10.1371/journal.pone.0101566[published Online First: Epub  
20  
21  
22  
23  
24  
25 Date]].
- 26  
27 12. Soma-Pillay P, Nelson-Piercy C, Tolppanen H, et al. Physiological changes in pregnancy.  
28  
29 Cardiovasc J Afr 2016;**27**(2):89-94 doi: 10.5830/CVJA-2016-021[published Online  
30  
31  
32 First: Epub Date]].
- 33  
34 13. Williams D. Pregnancy: a stress test for life. Curr Opin Obstet Gynecol 2003;**15**(6):465-  
35  
36  
37 71 doi: 10.1097/01.gco.0000103846.69273.ba[published Online First: Epub Date]].
- 38  
39 14. Adams Waldorf KM, Nelson JL. Autoimmune disease during pregnancy and the  
40  
41  
42  
43  
44  
45  
46  
47  
48  
49  
50  
51  
52  
53  
54  
55  
56  
57  
58  
59  
60  
60 microchimerism legacy of pregnancy. Immunol Invest. 2008/08/22 ed, 2008:631-44.
15. Rieck K, Telle K. Sick leave before, during and after pregnancy. Acta Sociologica  
2013;**56**:117-37.
16. OECD. OECD Family Database. Secondary OECD Family Database 2017.  
<http://www.oecd.org/social/family/database.htm>.
17. The Swedish Medical Birth Register- A summary of content and quality. The National  
Board of Health and Welfare: The Centre for Epidemiology, 2003.
18. Akerlind I, Alexanderson K, Hensing G, et al. Sex differences in sickness absence in  
relation to parental status. Scand J Soc Med 1996;**24**(1):27-35.

- 1  
2  
3 19. Bratberg E, Dahl S-A, RA. E. "The double burden": do combinations of career and family  
4 obligations increase sickness absence among women? *Eur Sociol Rev* 2002;**18**:233-49  
5  
6  
7 20. Rikets indelningar: Årsbok över regionala indelningar med koder, postadresser,  
8 telefonnummer m m. 2003 [Country classifications: Yearbook of regional  
9 classifications with codes, postal addresses, phone numbers, etc. 2003] [in Swedish].  
10 Stockholm, 2003.  
11  
12  
13  
14  
15  
16  
17 21. Mastekaasa A. Parenthood, gender and sickness absence. *Soc Sci Med* 2000;**50**(12):1827-  
18 42.  
19  
20  
21 22. Voss M, Floderus B, Diderichsen F. How do job characteristics, family situation,  
22 domestic work, and lifestyle factors relate to sickness absence? A study based on  
23 Sweden Post. *J Occup Environ Med* 2004;**46**(11):1134-43.  
24  
25  
26  
27  
28 23. Floderus B, Hagman M, Aronsson G, et al. Disability pension among young women in  
29 Sweden, with special emphasis on family structure: a dynamic cohort study. *BMJ*  
30 *Open* 2012;**2**(3) doi: 10.1136/bmjopen-2012-000840[published Online First: Epub  
31 Date]].  
32  
33  
34  
35  
36  
37 24. Ludvigsson JF, Almqvist C, Bonamy AK, et al. Registers of the Swedish total population  
38 and their use in medical research. *Eur J Epidemiol* 2016;**31**(2):125-36 doi:  
39 10.1007/s10654-016-0117-y[published Online First: Epub Date]].  
40  
41  
42  
43  
44 25. Ludvigsson JF, Andersson E, Ekblom A, et al. External review and validation of the  
45 Swedish national inpatient register. *BMC Public Health* 2011;**11**:450 doi:  
46 10.1186/1471-2458-11-450[published Online First: Epub Date]].  
47  
48  
49  
50  
51 26. MiDAS Sjukpenning och rehabiliteringspenning [The MiDAS register. Sickness absence  
52 benefits] [in Swedish]. The Swedish Social Insurance Agency, 2011.  
53  
54  
55  
56 27. Labour Force Surveys: Fourth Quarter 2017. Stockholm, 2017.  
57  
58  
59  
60

1  
2  
3 28. Hensing G, Alexanderson K, Allebeck P, et al. How to measure sickness absence?  
4

5 Literature review and suggestion of five basic measures. Scand J Soc Med  
6

7 1998;**26**(2):133-44.  
8  
9  
10  
11  
12  
13  
14  
15  
16  
17  
18  
19  
20  
21  
22  
23  
24  
25  
26  
27  
28  
29  
30  
31  
32  
33  
34  
35  
36  
37  
38  
39  
40  
41  
42  
43  
44  
45  
46  
47  
48  
49  
50  
51  
52  
53  
54  
55  
56  
57  
58  
59  
60

**FIGURE LEGENDS**

Figure 1. Crude mean annual net days of sickness absence (SA) and disability pension (DP) from Y-3 to Y+3, in Cohort1995, Cohort2000, and Cohort2005, respectively, by childbirth group.

Figure 2. Standardized mean annual net days of sickness absence (SA) and disability pension (DP) from Y-3 to Y+3 in Cohort1995, Cohort2000, and Cohort2005, respectively, by childbirth group.

Figure 3. Crude mean annual net days of sickness absence (SA) and disability pension (DP) from Y-3 to Y+3 in Cohort2005, by age group and childbirth group.



1  
2  
3  
4  
5  
6  
7  
8  
9  
10  
11  
12  
13  
14  
15  
16  
17  
18  
19  
20  
21  
22  
23  
24  
25  
26  
27  
28  
29  
30  
31  
32  
33  
34  
35  
36  
37  
38  
39  
40  
41  
42  
43  
44  
45  
46

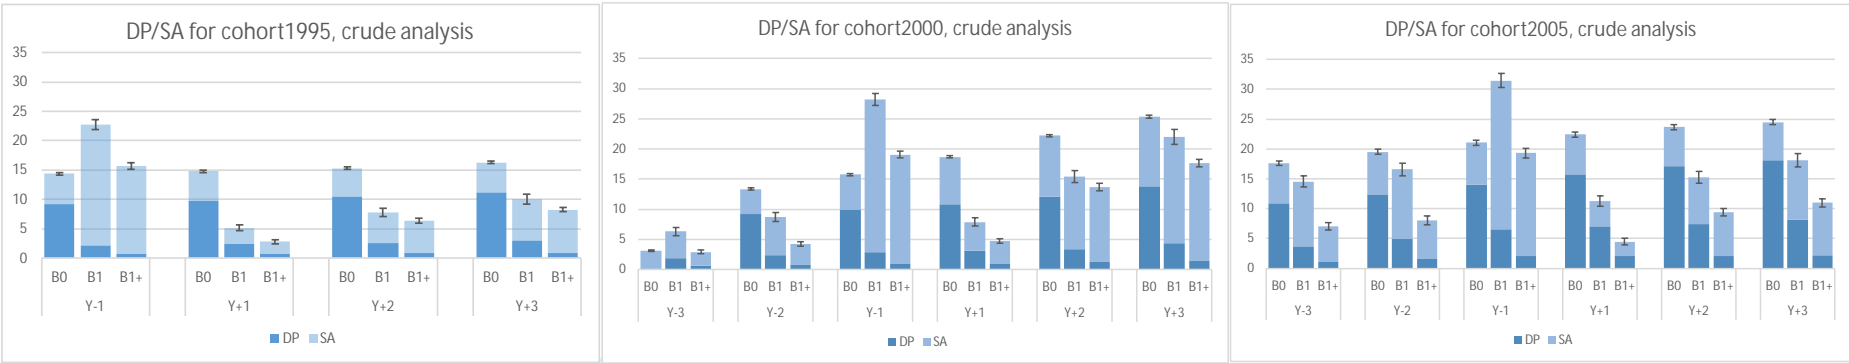

\*The vertical lines represent the confidence interval for the sum of SA and DP net days

Figure 1.

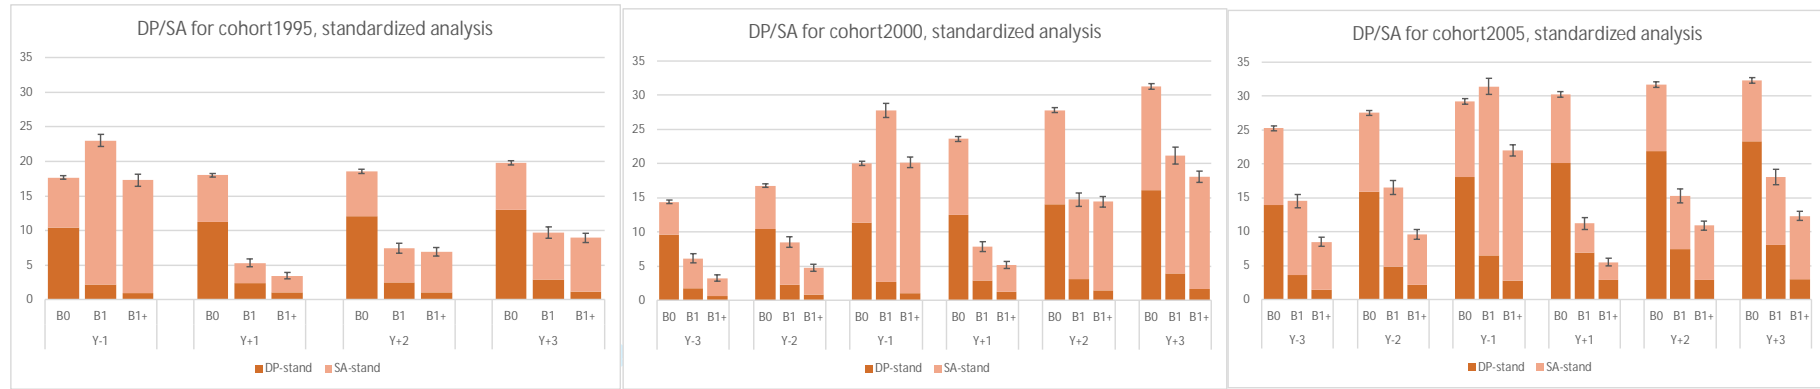

\*The vertical lines represent the confidence interval for the sum of SA and DP net days

Figure 2.

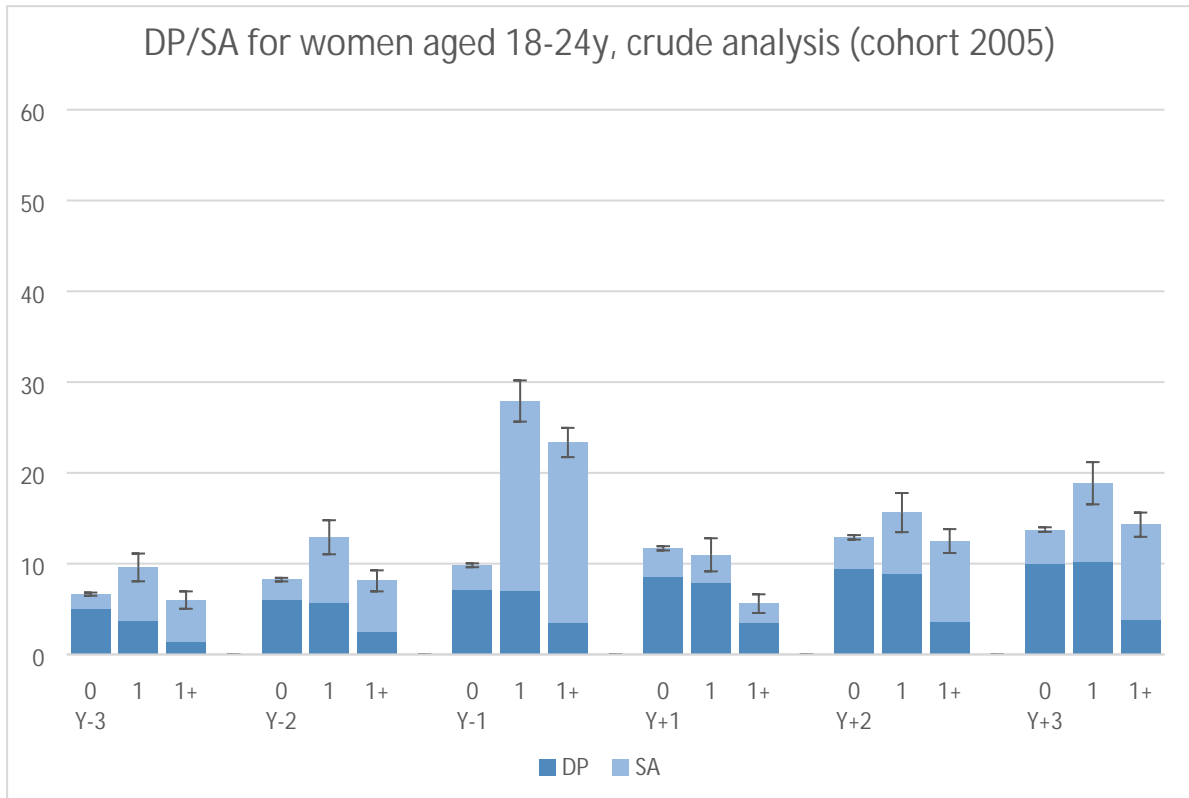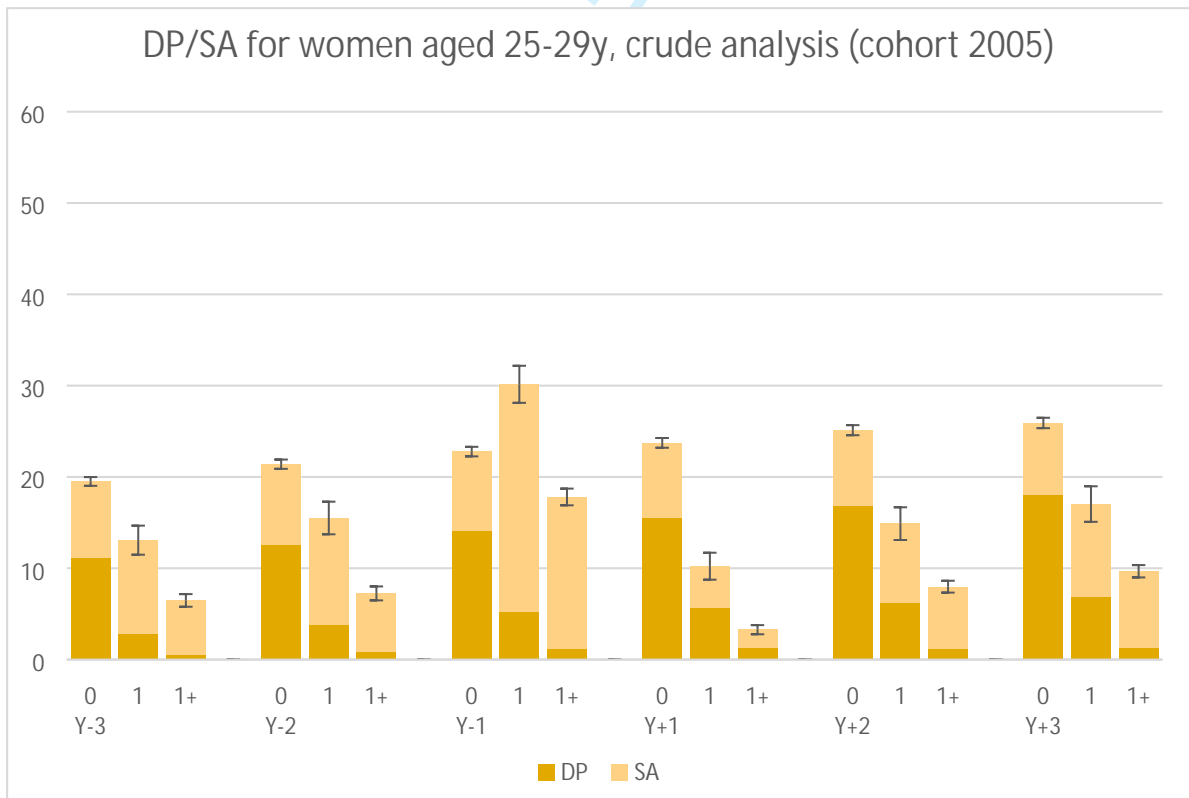

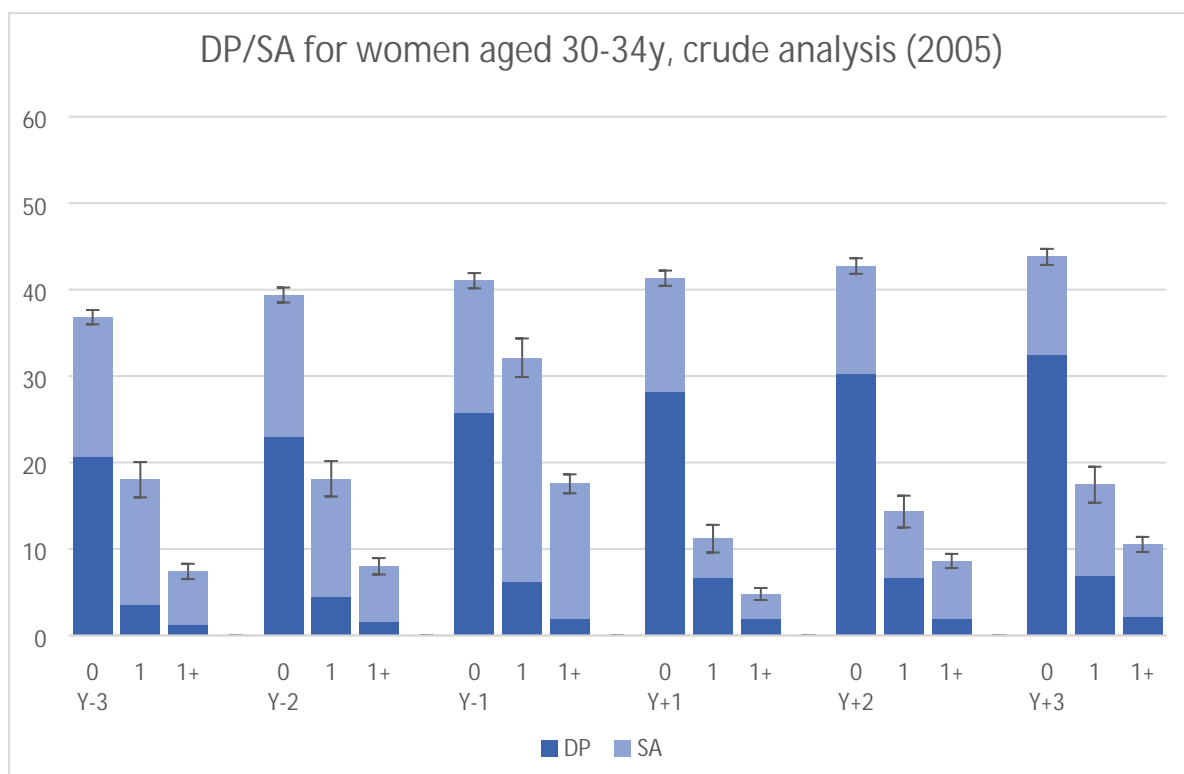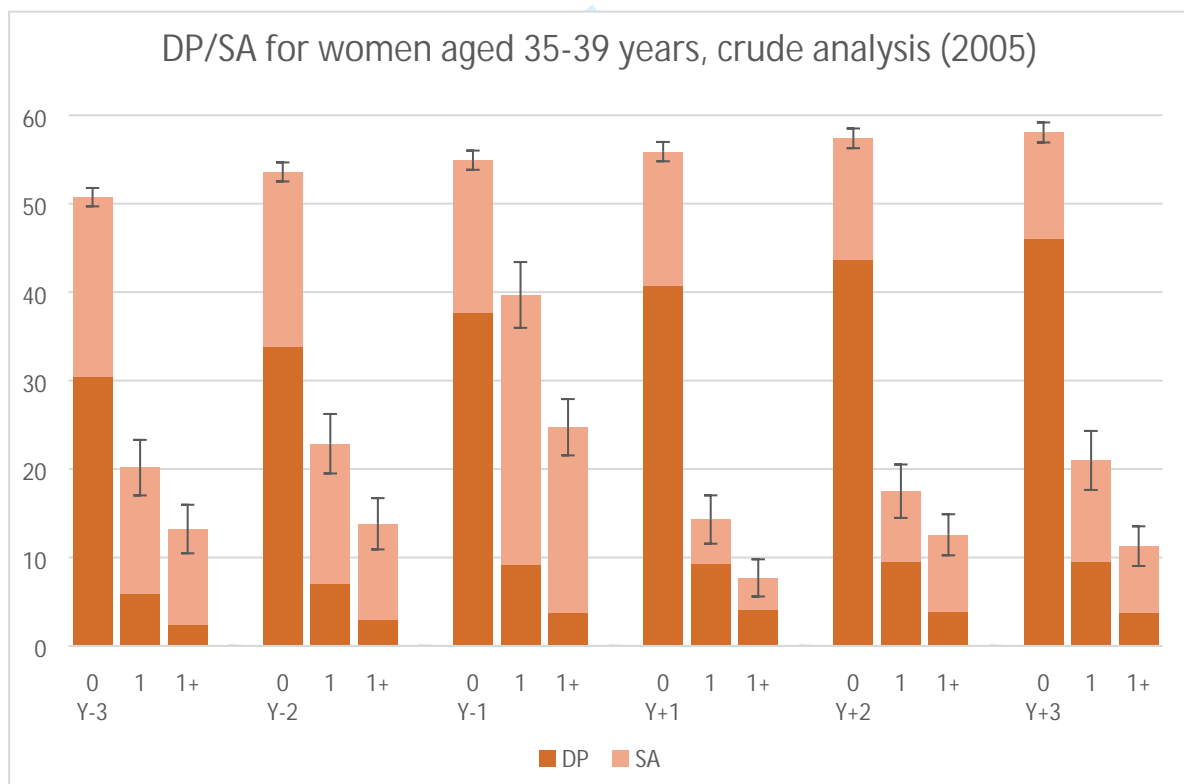

\*The vertical lines represent the confidence interval for the sum of SA and DP net days

Figure 3.

| STROBE Statement—Checklist of items that should be included in reports of <i>cohort studies</i> |         |                                                                                                                                                                                                   |                    |
|-------------------------------------------------------------------------------------------------|---------|---------------------------------------------------------------------------------------------------------------------------------------------------------------------------------------------------|--------------------|
|                                                                                                 | Item No | Recommendation                                                                                                                                                                                    | Page               |
| Title and abstract                                                                              | 1       | (a) Indicate the study's design with a commonly used term in the title or the abstract                                                                                                            | p. 1, 2            |
|                                                                                                 |         | (b) Provide in the abstract an informative and balanced summary of what was done and what was found                                                                                               | p. 2               |
| <b>Introduction</b>                                                                             |         |                                                                                                                                                                                                   |                    |
| Background/rationale                                                                            | 2       | Explain the scientific background and rationale for the investigation being reported                                                                                                              | p. 4-6             |
| Objectives                                                                                      | 3       | State specific objectives, including any prespecified hypotheses                                                                                                                                  | p. 5-6             |
| <b>Methods</b>                                                                                  |         |                                                                                                                                                                                                   |                    |
| Study design                                                                                    | 4       | Present key elements of study design early in the paper                                                                                                                                           | p. 6-7             |
| Setting                                                                                         | 5       | Describe the setting, locations, and relevant dates, including periods of recruitment, exposure, follow-up, and data collection                                                                   | p. 6-8             |
| Participants                                                                                    | 6       | (a) Give the eligibility criteria, and the sources and methods of selection of participants. Describe methods of follow-up                                                                        | p. 6-8             |
|                                                                                                 |         | (b) For matched studies, give matching criteria and number of exposed and unexposed                                                                                                               | -                  |
| Variables                                                                                       | 7       | Clearly define all outcomes, exposures, predictors, potential confounders, and effect modifiers. Give diagnostic criteria, if applicable                                                          | p. 7, 8            |
| Data sources/<br>measurement                                                                    | 8*      | For each variable of interest, give sources of data and details of methods of assessment (measurement). Describe comparability of assessment methods if there is more than one group              | p. 6-8             |
| Bias                                                                                            | 9       | Describe any efforts to address potential sources of bias                                                                                                                                         | p. 8, 9            |
| Study size                                                                                      | 10      | Explain how the study size was arrived at                                                                                                                                                         | p. 7, 11           |
| Quantitative variables                                                                          | 11      | Explain how quantitative variables were handled in the analyses. If applicable, describe which groupings were chosen and why                                                                      | p. 7-9, 11         |
| Statistical methods                                                                             | 12      | (a) Describe all statistical methods, including those used to control for confounding                                                                                                             | p. 8, 9            |
|                                                                                                 |         | (b) Describe any methods used to examine subgroups and interactions                                                                                                                               | p. 9               |
|                                                                                                 |         | (c) Explain how missing data were addressed                                                                                                                                                       | -                  |
|                                                                                                 |         | (d) If applicable, explain how loss to follow-up was addressed                                                                                                                                    | p. 12              |
|                                                                                                 |         | (e) Describe any sensitivity analyses                                                                                                                                                             | p. 9               |
| <b>Results</b>                                                                                  |         |                                                                                                                                                                                                   |                    |
| Participants                                                                                    | 13*     | (a) Report numbers of individuals at each stage of study—eg numbers potentially eligible, examined for eligibility, confirmed eligible, included in the study, completing follow-up, and analysed | p. 11, 12          |
|                                                                                                 |         | (b) Give reasons for non-participation at each stage                                                                                                                                              | p. 7, 12           |
|                                                                                                 |         | (c) Consider use of a flow diagram                                                                                                                                                                | -                  |
| Descriptive data                                                                                | 14*     | (a) Give characteristics of study participants (eg demographic, clinical, social) and information on exposures and potential confounders                                                          | p. 11              |
|                                                                                                 |         | (b) Indicate number of participants with missing data for each variable of interest                                                                                                               | p. 11              |
|                                                                                                 |         | (c) Summarise follow-up time (eg, average and total amount)                                                                                                                                       | -                  |
| Outcome data                                                                                    | 15*     | Report numbers of outcome events or summary measures over time                                                                                                                                    | p. 13, Figures 1-3 |
| Main results                                                                                    | 16      | (a) Give unadjusted estimates and, if applicable, confounder-adjusted                                                                                                                             | Figures 1-3        |

|                          |    |                                                                                                                                                                            |          |
|--------------------------|----|----------------------------------------------------------------------------------------------------------------------------------------------------------------------------|----------|
|                          |    | estimates and their precision (eg, 95% confidence interval). Make clear which confounders were adjusted for and why they were included                                     |          |
|                          |    | (b) Report category boundaries when continuous variables were categorized                                                                                                  | p. 8, 11 |
|                          |    | (c) If relevant, consider translating estimates of relative risk into absolute risk for a meaningful time period                                                           | -        |
| Other analyses           | 17 | Report other analyses done—eg analyses of subgroups and interactions, and sensitivity analyses                                                                             | p. 13-14 |
| <b>Discussion</b>        |    |                                                                                                                                                                            |          |
| Key results              | 18 | Summarise key results with reference to study objectives                                                                                                                   | p. 14    |
| Limitations              | 19 | Discuss limitations of the study, taking into account sources of potential bias or imprecision. Discuss both direction and magnitude of any potential bias                 | p. 16    |
| Interpretation           | 20 | Give a cautious overall interpretation of results considering objectives, limitations, multiplicity of analyses, results from similar studies, and other relevant evidence | p. 14-16 |
| Generalisability         | 21 | Discuss the generalisability (external validity) of the study results                                                                                                      | p. 15-16 |
| <b>Other information</b> |    |                                                                                                                                                                            |          |
| Funding                  | 22 | Give the source of funding and the role of the funders for the present study and, if applicable, for the original study on which the present article is based              | p. 17    |

\*Give information separately for exposed and unexposed groups.

**Note:** An Explanation and Elaboration article discusses each checklist item and gives methodological background and published examples of transparent reporting. The STROBE checklist is best used in conjunction with this article (freely available on the Web sites of PLoS Medicine at <http://www.plosmedicine.org/>, Annals of Internal Medicine at <http://www.annals.org/>, and Epidemiology at <http://www.epidem.com/>). Information on the STROBE Initiative is available at <http://www.strobe-statement.org>.

# BMJ Open

## Sickness absence and disability pension before and after first childbirth and in nulliparous women: longitudinal analyses of three cohorts in Sweden

|                                 |                                                                                                                                                                                                                                                                                                                                                                                                                                                                  |
|---------------------------------|------------------------------------------------------------------------------------------------------------------------------------------------------------------------------------------------------------------------------------------------------------------------------------------------------------------------------------------------------------------------------------------------------------------------------------------------------------------|
| Journal:                        | <i>BMJ Open</i>                                                                                                                                                                                                                                                                                                                                                                                                                                                  |
| Manuscript ID                   | bmjopen-2019-031593.R1                                                                                                                                                                                                                                                                                                                                                                                                                                           |
| Article Type:                   | Research                                                                                                                                                                                                                                                                                                                                                                                                                                                         |
| Date Submitted by the Author:   | 12-Jul-2019                                                                                                                                                                                                                                                                                                                                                                                                                                                      |
| Complete List of Authors:       | Björkenstam, Charlotte; Karolinska Institute<br>Orellana, Cecilia; Karolinska Institutet<br>Laszlo, Krisztina; Karolinska Institutet, Department of Public Health Sciences<br>Svedberg, Pia; Karolinska Institutet, Department of Clinical Neuroscience<br>Voss, Margaretha; Karolinska Institutet<br>Lidwall, Ulrik; Karolinska Institutet<br>Lindfors, Petra; Stockholm University, Department of Psychology<br>Alexanderson, Kristina; Karolinska Institutet, |
| <b>Primary Subject Heading</b>: | Public health                                                                                                                                                                                                                                                                                                                                                                                                                                                    |
| Secondary Subject Heading:      | Obstetrics and gynaecology                                                                                                                                                                                                                                                                                                                                                                                                                                       |
| Keywords:                       | sick leave, disability pension, childbirth, cohort study, pregnancy, child delivery                                                                                                                                                                                                                                                                                                                                                                              |
|                                 |                                                                                                                                                                                                                                                                                                                                                                                                                                                                  |

SCHOLARONE™  
Manuscripts

1  
2  
3 **Sickness absence and disability pension before and after first**  
4  
5  
6 **childbirth and in nulliparous women: longitudinal analyses of**  
7  
8  
9 **three cohorts in Sweden**  
10  
11  
12  
13  
14

15 Charlotte Björkenstam<sup>1</sup>, Cecilia Orellana<sup>2</sup>, Krisztina D. László<sup>1,3</sup>, Pia Svedberg<sup>1</sup>, Margaretha  
16 Voss<sup>1</sup>, Ulrik Lidwall<sup>1,4</sup>, Petra Lindfors<sup>5</sup>, Kristina Alexanderson<sup>1</sup>  
17  
18  
19  
20  
21

22 <sup>1</sup>Division of Insurance Medicine, Department of Clinical Neuroscience, Karolinska Institutet,  
23 Stockholm, Sweden  
24  
25

26 <sup>2</sup>Unit of Occupational Medicine, Institute of Environmental Medicine, Karolinska Institutet,  
27 Stockholm, Sweden  
28  
29

30 <sup>3</sup>Department of Public Health Sciences, Karolinska Institutet, Stockholm, Sweden  
31  
32

33 <sup>4</sup>Department for Analysis and Forecast, Swedish Social Insurance Agency, Stockholm,  
34 Sweden  
35  
36

37 <sup>5</sup>Department of Psychology, Stockholm University, Stockholm, Sweden  
38  
39  
40  
41  
42  
43

44 Correspondence to: Krisztina László

45 Division of Insurance Medicine, Department of Clinical Neuroscience, Karolinska Institutet,  
46 SE-171 77 Stockholm, Sweden  
47  
48

49 E-mail: [krisztina.laszlo@ki.se](mailto:krisztina.laszlo@ki.se); Telephone: +46730209761.  
50  
51  
52  
53  
54  
55  
56  
57

58 Word count for the text: 3414  
59  
60



## ABSTRACT

**Objective** Childbirth is suggested to be associated with elevated levels of sickness absence (SA) and disability pension (DP). However, detailed knowledge about SA/DP patterns around childbirth is lacking. We aimed to compare SA/DP across different time periods among women according to their childbirth status.

**Design** Register-based longitudinal cohort study.

**Setting** Sweden.

**Participants** Three population-based cohorts of nulliparous women aged 18-39 years, living in Sweden 31 December 1994, 1999, or 2004 (nearly 500,000/cohort).

**Primary and secondary outcome measures** Sum of SA>14 and DP net days/year.

**Methods** We compared crude and standardized mean SA and DP days/year during the three years preceding and the three years after first childbirth date ( $Y_{-3}$  to  $Y_{+3}$ ), among women having (1) their first and only birth during the subsequent three years (B1), (2) their first birth and at least another delivery (B1+), and (3) no childbirths during follow-up (B0).

**Results** Despite an increase in SA in the year preceding the first childbirth, women in the B1 group, and especially in B1+, tended to have fewer SA/DP days throughout the years than women in the B0 group. For cohort 2005, the mean SA/DP days/year (95% confidence intervals) in the B0, B1, and B1+ groups were for  $Y_{-3}$ : 25.3 (24.9-25.7), 14.5 (13.6-15.5), and 8.5 (7.9-9.2);  $Y_{-2}$ : 27.5 (27.1-27.9), 16.6 (15.5-17.6), and 9.6 (8.9-10.4);  $Y_{-1}$ : 29.2 (28.8-29.6), 31.4 (30.2-32.6) and 22.0 (21.2-22.9);  $Y_{+1}$ : 30.2 (29.8-30.7), 11.2 (10.4-12.1), and 5.5 (5.0-6.1);  $Y_{+2}$ : 31.7 (31.3-32.1), 15.3 (14.2-16.3), and 10.9 (10.3-11.6);  $Y_{+3}$ : 32.3 (31.9-32.7), 18.1 (17.0-19.3), and 12.4 (11.7-13.0), respectively. These patterns were the same in all three cohorts.

1  
2  
3 **Conclusions** Women with more than one childbirth had fewer SA/DP days/year compared to  
4  
5 women with one childbirth or with no births. Women who did not give birth had markedly  
6  
7 more DP days than those giving birth, suggesting a health selection into childbirth.  
8  
9

10 **Key words** Sick leave, disability pension, childbirth, cohort study, postpartum, pregnancy,  
11  
12 child delivery  
13  
14  
15  
16  
17  
18  
19

#### 20 **Strengths and limitations of this study**

- 21
- 22
- 23 • The study involved longitudinal analyses of both sickness absence and disability  
24 pension.  
25
- 26
- 27 • It was population-based, we included virtually all nulliparous women in Sweden  
28 during the study periods.  
29
- 30
- 31 • By analysing three cohorts of women five years apart we explored potential time-  
32 period effects.  
33
- 34
- 35 • Since we used large, nationwide data, statistical precision in our analyses was high.  
36
- 37
- 38 • We had no information on sickness absence spells  $\leq 14$  days.  
39  
40  
41  
42  
43  
44  
45  
46  
47  
48  
49  
50  
51  
52  
53  
54  
55  
56  
57  
58  
59  
60

## BACKGROUND

In many countries with high labour force participation of women, women have higher levels of sickness absence (SA) and disability pension (DP) than men.<sup>1-4</sup> One suggestion to explain this gender difference focuses on SA during pregnancy and after childbirth.<sup>5-8</sup> Also for DP, pregnancy has been suspected to be a factor behind this gender gap, although findings are less consistent than for SA.<sup>8</sup> Swedish studies have shown that women have higher SA during pregnancy, as well as during the years following childbirth, as compared to other years.<sup>5 6 9 10</sup> Yet, it is unclear whether women have elevated rates of SA also during the years preceding their first childbirth. Findings from twin studies, have shown that women who gave birth had lower average number of SA days compared with their nulliparous twin sisters.<sup>5 10 11</sup> After delivery the average number of SA days were similar in both groups. However, few studies have focused on SA and DP in different groups of women; most have focused on gender differences.

Pregnancy and the postpartum period are characterized by important alterations in endocrine, metabolic, immune, and cardiovascular function.<sup>12 13</sup> Changes in immunity in pregnancy may result in higher maternal susceptibility to certain common infectious diseases and in diminished immune responses. This could lead to more severe disease courses in pregnancy, than in the non-pregnant state and consequently to longer SA spells. Similarly, while women's conditions with certain autoimmune diseases improve during pregnancy and may deteriorate after delivery, for others there is a deterioration or no change during gestation.<sup>14</sup> Also, women with a genetic vulnerability or certain risk factors, may experience pregnancy-induced hypertension/preeclampsia, gestational diabetes, peri- and postpartum thrombotic events, or peri- and postpartum psychiatric disorders. Several of these conditions reverse shortly after delivery/the postpartum period, but may reappear later in vulnerable women and

1  
2  
3 result in SA or DP.<sup>13</sup> Women with in vitro fertilization may have increased SA also in the  
4  
5 time preceding conception.  
6

7  
8 Regarding SA, a Norwegian study found that the higher SA risk in women in the years after  
9  
10 pregnancy disappeared when SA during subsequent pregnancies were accounted for.<sup>15</sup>  
11

12  
13 However, this study included mothers only and no information on DP was included, which  
14  
15 means that long-term or permanent reductions in work capacity was not accounted for.  
16

17  
18 The mean age for first childbirth, and the prevalence of several maternal chronic diseases, of  
19  
20 obesity, and in vitro fertilization has increased over the past decades, which may contribute to  
21  
22 an increase in rates over time of certain complications related to pregnancy and childbirth<sup>6 16</sup>  
23  
24 <sup>17</sup> and subsequently higher SA rates during and shortly after pregnancy.  
25

26  
27 It has also been argued that the combination of paid and unpaid work could be one reason for  
28  
29 women having higher levels of SA and DP than men.<sup>18-20</sup> However, other findings have  
30  
31 reported a positive association between multiple roles and health and well-being,  
32  
33 respectively.<sup>21 22</sup> One exception is single mothers, for whom DP levels according to a Swedish  
34  
35 study are higher than for married or cohabiting mothers, a difference that increases with the  
36  
37 number of children.<sup>23</sup>  
38

39  
40 There might also be a positive health selection into giving birth, where women not giving  
41  
42 birth may have poorer health and thus are unable to, or choose not to give birth.<sup>5 10 11</sup>  
43

44  
45 However, with these three studies having included twins only, the generalizability to the  
46  
47 general population is unclear.  
48

49  
50 Our aim was to gain knowledge on SA and DP over time in women, in relation to childbirth  
51  
52 while accounting for period effects. Specifically, we wanted to compare annual mean net days  
53  
54 of SA and DP among women giving and not giving birth, covering a period of three years  
55  
56 before and after childbirth. As both childbirth and age are associated with socioeconomic  
57  
58  
59  
60

1  
2  
3 position, another aim was to examine if the association between childbirth and SA/DP varied  
4  
5 between age groups.  
6  
7  
8  
9  
10

## 11 12 **METHODS**

13  
14 Longitudinal population-based cohort studies were conducted. We created three different  
15  
16 population-based cohorts, using the unique personal identity number assigned to all residents  
17  
18 in Sweden for linkage of microdata from five Swedish nationwide registers, from the  
19  
20 following three authorities:<sup>24</sup>  
21  
22

23  
24 -From Statistics Sweden: The Longitudinal Integration Database for Health Insurance and  
25  
26 Labor Market Studies (LISA) regarding sociodemographic information, year of immigration,  
27  
28 and emigration.<sup>25</sup>  
29

30  
31 -From the National Board of Health and Welfare: 1) The Medical Birth Register (MBR) for  
32  
33 dates of childbirth and parity. This register covers 97-99% of all births in Sweden since  
34  
35 1973<sup>17</sup>; 2) the National In-Patient Register for information since 1964 on childbirths not found  
36  
37 in the MBR.<sup>26</sup> We used main or secondary diagnoses related to childbirth (as defined by the  
38  
39 International Classification of Disease (ICD): ICD-7: 660, 670-678; ICD-8: 650-662; ICD-9:  
40  
41 650, 651, 652, 659X, W/659.W-659.X, 669.E,F,G,H,W,X; ICD-10:O75.7-O75.9, O80-84). If  
42  
43 a delivery appeared in both registers, the date from the MBR was used. 3) The Causes of  
44  
45 Death Register for date of death.  
46  
47

48  
49 -From the Swedish Social Insurance Agency, information from their register Micro Data for  
50  
51 Analysis of Social Insurance (MiDAS) on SA and DP (start and end dates and extent) for the  
52  
53 period 1994-2008<sup>27</sup>. Only SA spells >14 days were included.  
54  
55

56  
57 In Sweden, all individuals aged 16 years or older with income from work or unemployment  
58  
59 benefits, are entitled to sickness absence benefits from the public sickness insurance system, if  
60

1  
2  
3 unable to work due to disease or injury. There is one waiting day and a physician certificate is  
4  
5 needed from day 8. For employees, sick pay is paid by the employer during the first 14 days  
6  
7 of a SA spell. People aged 19-64 who, who due to disease or injury have a long-term or  
8  
9 permanently reduced work capacity can be granted DP. Both SA and DP can be granted for  
10  
11 full- or part-time (25%, 50% or 75%) of ordinary work hours. Approximately 80% of the lost  
12  
13 income, up to a certain limit, is covered by SA benefits, while DP covers up to 65%. Parents  
14  
15 can stay home to care for a sick child for 60 days/year/child, with benefits at the same level as  
16  
17 SA. There is no waiting day. The number of days can be prolonged in the case of severe  
18  
19 disease of the child (e.g., cancer).  
20  
21  
22  
23  
24  
25

## 26 **Cohorts**

27  
28 We created three cohorts (Cohort1995, Cohort2000, Cohort2005) of all women living in  
29  
30 Sweden and aged 18-39 years on 31 December 1994, 1999, or 2004, respectively, using the  
31  
32 LISA register. To study SA and DP during the three years prior to three years after first child  
33  
34 delivery date ( $T_0$ ), and to allow comparisons with women not having any births during this  
35  
36 period, we only included women who resided in Sweden during the three years prior to the  
37  
38 respective inclusion year. To handle that the outcome (SA/DP) might be influenced by a new  
39  
40 pregnancy, all women were followed up also for a new childbirth in the 43 weeks after  $Y_{+3}$ .  
41  
42  
43  
44

45 For each cohort, we identified three groups of women:

- 46 • B0: Women having no childbirths registered neither before nor during the follow-up.
- 47
- 48 • B1: Women having their first childbirth during the index year and no additional births
- 49
- 50 registered during the follow-up.
- 51
- 52 • B1+: Women having their first childbirth during the index year and at least one more
- 53
- 54 birth during the follow-up.
- 55
- 56
- 57
- 58
- 59
- 60

1  
2  
3 Thus, all women with a childbirth prior to the index year (1995, 2000, or 2005) were  
4  
5 excluded. For the women in B0,  $T_0$  was set to 2 July of each index year.  
6  
7  
8  
9

## 10 11 **Outcome**

12  
13 We calculated the number of annual mean net SA and DP days for each of the three years  
14  
15 preceding  $T_0$  and the three years after, for each cohort, respectively. However, as data on SA  
16  
17 and DP was only available from 1994, only one year prior to  $T_0$  was considered for  
18  
19 Cohort1995. Part-time SA/DP days were combined, e.g., two days of half-time SA or DP was  
20  
21 counted as one net day.  
22  
23  
24  
25  
26

## 27 **Sociodemographics**

28  
29 The following covariates were included: age (categorized into four groups: 18-24, 25-29, 30-  
30  
31 34, and 35-39 years), country of birth (Sweden, other Scandinavian country, other EU 25, and  
32  
33 rest of the world), type of living area (based on the H-classification scheme<sup>20</sup>), categorized as:  
34  
35 large city (Stockholm, Gothenburg, Malmö); medium-sized city ( $\geq 90,000$  inhabitants); and  
36  
37 small city/village ( $< 90,000$  inhabitants)), family situation (married/cohabitant and single), and  
38  
39 educational level (categorized as elementary ( $\leq 9$  years), high school (10–12 years), and  
40  
41 university/college ( $> 12$  years)). These variables were obtained from the LISA register and  
42  
43 were measured on 31 December 1994, 1999, and 2004, respectively.  
44  
45  
46  
47  
48  
49  
50

## 51 **Statistical analyses**

52  
53 We calculated annual mean numbers of net SA and DP days, starting three years preceding  
54  
55 the date of the first childbirth ( $Y_{-3}$ ) until three years after ( $Y_{+3}$ ) for the three comparisons  
56  
57 groups (B0, B1, B1+) within each cohort. Both crude and standardized mean numbers of net  
58  
59  
60

1  
2  
3 days were calculated. We used a direct standardization using Cohort2005 as the standard  
4  
5 population. In the standardization, all sociodemographic variables were taken into account;  
6  
7 age (in four categories), country of birth, place of residence, educational level, and family  
8  
9 status (as binary). Women who died or emigrated within three years after child delivery were  
10  
11 excluded from the analyses from the year after death or emigration.  
12  
13

14 Further, for Cohort2005, we calculated the proportion of all women who had DP or at least  
15  
16 one SA spell >14 days, respectively, and also the proportion of women with SA among those  
17  
18 who had no DP.  
19  
20

21 As age is strongly associated with both SA/DP and childbirth,<sup>6</sup> we also performed analyses  
22  
23 stratified by age for Cohort2005, calculating 95% confidence intervals (CI) for the means of  
24  
25 the sums of SA and DP net days. All analyses were conducted using SAS 9.4.  
26  
27

28 The project was approved by the Regional Ethical Review Board in Stockholm, Sweden.  
29  
30  
31  
32

### 33 **Patient and public involvement**

34  
35 The study participants or the general public were not involved in decisions about the research  
36  
37 question, the design of the study, the outcomes, the conduct of the study, the drafting of the  
38  
39 paper, nor in the dissemination of the study results.  
40  
41  
42  
43  
44  
45  
46

## 47 **RESULTS**

48  
49 In all three cohorts, 92-93% of the women had no childbirths, that is, they belonged to the  
50  
51 group B0 (Table 1). Around 13,000 to 15,000 women had had their first childbirth during the  
52  
53 index year (3%) but no more births during the study period, i.e., belonged to group B1. About  
54  
55 21,000 to 25,000 women belonged to B1+, i.e., had their first delivery during the index year  
56  
57 and at least one additional childbirth during follow-up (4-5%). Women in B0 were younger  
58  
59  
60



1  
2  
3 (18-24 years), had lower educational level, and were to a higher extent single. A lower rate of  
4  
5 women in B1+ were in the oldest age group (i.e., 35-39 years), as compared to women in B0  
6  
7 and B1. Furthermore, women in group B1+ were more likely to have higher education and to  
8  
9 be married or cohabiting, than those in B0 and B1.

10  
11  
12 For Cohort2005, women in B1 had the highest proportion of SA/DP combined during  $Y_{-3}$  to  
13  
14  $Y_{-1}$ , as well as the highest proportion of SA between  $Y_{-3}$  to  $Y_{+1}$ , while B1+ had both highest  
15  
16 proportion of SA/DP combined and SA the other years (Table 2). The highest proportions of  
17  
18 women on DP were found for B0 during all years, ranging from 3.4% to 5.8%. Among DP  
19  
20 recipients, the proportion on part-time DP was lowest in B0 and highest in B1+ (Table 2).

21  
22  
23 Among SA recipients, women in B1+ were more likely to have shorter SA spells than women  
24  
25 in B0 or B1+ (Table 2).  
26  
27  
28  
29  
30  
31  
32  
33  
34  
35  
36  
37  
38  
39  
40  
41  
42  
43  
44  
45  
46  
47  
48  
49  
50  
51  
52  
53  
54  
55  
56  
57  
58  
59  
60

**Table 1.** Characteristics of the three cohorts of women, by cohort and childbirth group<sup>1</sup>.

|                                | Cohort 1995 (N=486,628) |                 |                  | Cohort 2000 (N=490,878) |       |       | Cohort 2005 (N=492,504) |       |       |
|--------------------------------|-------------------------|-----------------|------------------|-------------------------|-------|-------|-------------------------|-------|-------|
|                                | B0 <sup>1</sup>         | B1 <sup>1</sup> | B1+ <sup>1</sup> | B0                      | B1    | B1+   | B0                      | B1    | B1+   |
| N                              | 450630                  | 15096           | 20902            | 455962                  | 13569 | 21347 | 453532                  | 14299 | 24673 |
| <b>Age (years)</b>             |                         |                 |                  |                         |       |       |                         |       |       |
| 18-24                          | 58.1                    | 36.2            | 35.3             | 55.4                    | 29.4  | 25.6  | 56.7                    | 25.8  | 21.4  |
| 25-29                          | 19.9                    | 35.5            | 43.7             | 21.6                    | 36.0  | 46.2  | 20.4                    | 32.1  | 42.0  |
| 30-34                          | 11.9                    | 20.1            | 17.7             | 12.4                    | 24.4  | 23.8  | 12.4                    | 28.6  | 30.9  |
| 35-39                          | 10.1                    | 8.2             | 3.3              | 10.6                    | 10.2  | 4.4   | 10.5                    | 13.5  | 5.8   |
| <b>Country of birth</b>        |                         |                 |                  |                         |       |       |                         |       |       |
| Sweden                         | 90.5                    | 91.1            | 94.0             | 89.0                    | 88.2  | 93.0  | 87.6                    | 86.6  | 91.5  |
| Other Scandinavian country     | 2.2                     | 2.6             | 1.7              | 1.4                     | 1.7   | 1.2   | 1.1                     | 1.4   | 1.0   |
| Other EU 25                    | 1.6                     | 1.3             | 0.8              | 1.5                     | 1.3   | 0.8   | 1.6                     | 1.5   | 1.0   |
| Rest of the world              | 5.7                     | 5.0             | 3.5              | 8.1                     | 8.8   | 5.0   | 9.7                     | 10.5  | 6.5   |
| <b>Type of living area</b>     |                         |                 |                  |                         |       |       |                         |       |       |
| Large cities                   | 41.7                    | 39.7            | 37.0             | 43.3                    | 41.6  | 41.4  | 43.4                    | 43.8  | 44.1  |
| Medium-sized cities            | 34.9                    | 34.9            | 35.4             | 35.1                    | 34.5  | 34.2  | 35.7                    | 33.7  | 34.2  |
| Small cities/village           | 23.4                    | 25.4            | 27.6             | 21.7                    | 23.9  | 24.4  | 20.9                    | 22.5  | 21.8  |
| <b>Educational level</b>       |                         |                 |                  |                         |       |       |                         |       |       |
| Elementary school (≤9 years)   | 19.4                    | 15.3            | 9.2              | 21.9                    | 18.5  | 9.6   | 20.0                    | 12.7  | 7.1   |
| High school (10-12 years)      | 57.2                    | 60.0            | 57.3             | 49.5                    | 52.7  | 48.1  | 45.9                    | 47.2  | 38.6  |
| University/college (≥13 years) | 23.4                    | 24.7            | 33.5             | 28.6                    | 28.8  | 42.3  | 34.1                    | 40.1  | 54.3  |
| <b>Family situation</b>        |                         |                 |                  |                         |       |       |                         |       |       |
| Married or cohabitant          | 6.0                     | 22.0            | 28.7             | 5.1                     | 22.3  | 29.2  | 4.5                     | 22.5  | 27.7  |
| Single                         | 94.0                    | 78.0            | 71.3             | 94.9                    | 77.7  | 70.8  | 95.5                    | 77.5  | 72.3  |

<sup>1</sup>B0=No childbirth during follow-up, B1=First childbirth during index year (at date T<sub>0</sub>) of each cohort and no more children during follow-up, B1+=First childbirth at T<sub>0</sub> and at least one more during follow-up.

**Table 2.** Proportion of women with a sickness absence spell >14 days and disability pension during the six different years before and after childbirth, for Cohort2005, by childbirth group

| Year                         | Childbirth group | Total study population |                        |                     |                     | Of DP recipients, received DP |              | Of SA recipients, received SA for a period of |                 |                  |               |
|------------------------------|------------------|------------------------|------------------------|---------------------|---------------------|-------------------------------|--------------|-----------------------------------------------|-----------------|------------------|---------------|
|                              |                  | N                      | SA/DP <sup>1</sup> (%) | DP <sup>1</sup> (%) | SA <sup>2</sup> (%) | Part of the year (%)          | All year (%) | >0-30 days (%)                                | >30-90 days (%) | >90-180 days (%) | >180 days (%) |
| Y <sub>-3</sub>              | B0               | 453532                 | 9.5                    | 3.4                 | 6.6                 | 26.8                          | 73.2         | 40.0                                          | 22.8            | 13.6             | 23.6          |
|                              | B1               | 14299                  | 12.6                   | 1.4                 | 11.6                | 53.8                          | 46.2         | 43.1                                          | 22.6            | 14.9             | 19.4          |
|                              | B1+              | 24673                  | 8.9                    | 0.5                 | 8.6                 | 63.4                          | 36.6         | 51.0                                          | 24.0            | 12.7             | 12.3          |
| Y <sub>-2</sub>              | B0               | 453532                 | 9.5                    | 3.9                 | 6.2                 | 24.3                          | 75.7         | 34.2                                          | 23.3            | 14.8             | 27.7          |
|                              | B1               | 14299                  | 12.7                   | 2.0                 | 11.4                | 52.8                          | 47.2         | 40.8                                          | 22.3            | 14.1             | 22.8          |
|                              | B1+              | 24673                  | 8.6                    | 0.7                 | 8.1                 | 60.9                          | 39.1         | 45.7                                          | 25.5            | 13.8             | 14.9          |
| Y <sub>-1</sub>              | B0               | 453532                 | 10.3                   | 4.5                 | 6.5                 | 25.5                          | 74.5         | 36.3                                          | 23.6            | 15.3             | 24.8          |
|                              | B1               | 14299                  | 36.2                   | 2.4                 | 35.0                | 44.7                          | 55.3         | 37.8                                          | 36.9            | 15.8             | 9.5           |
|                              | B1+              | 24673                  | 30.6                   | 0.8                 | 30.2                | 50.8                          | 49.2         | 45.4                                          | 35.8            | 13.3             | 5.6           |
| Y <sub>+1</sub>              | B0               | 453532                 | 11.1                   | 5.0                 | 6.9                 | 25.5                          | 74.5         | 41.1                                          | 23.2            | 13.9             | 21.9          |
|                              | B1               | 14299                  | 10.7                   | 2.4                 | 8.7                 | 36.2                          | 63.8         | 61.5                                          | 22.5            | 8.4              | 7.7           |
|                              | B1+              | 24673                  | 6.8                    | 0.8                 | 6.1                 | 49.7                          | 50.3         | 67.9                                          | 20.2            | 6.5              | 5.4           |
| Y <sub>+2</sub> <sup>3</sup> | B0               | 448921                 | 11.8                   | 5.4                 | 7.3                 | 26.5                          | 73.5         | 43.1                                          | 22.6            | 13.7             | 20.6          |
|                              | B1               | 14270                  | 10.7                   | 2.6                 | 8.7                 | 37.1                          | 62.9         | 44.1                                          | 21.5            | 14.1             | 20.3          |
|                              | B1+              | 24671                  | 15.1                   | 0.8                 | 14.5                | 45.4                          | 54.6         | 50.4                                          | 33.4            | 11.7             | 4.6           |
| Y <sub>+3</sub> <sup>3</sup> | B0               | 443320                 | 12.0                   | 5.8                 | 7.1                 | 27.1                          | 72.9         | 43.7                                          | 23.1            | 13.2             | 20.0          |
|                              | B1               | 14183                  | 12.7                   | 2.9                 | 10.6                | 43.0                          | 57.0         | 44.7                                          | 20.9            | 13.2             | 21.1          |
|                              | B1+              | 24667                  | 19.1                   | 0.8                 | 18.5                | 47.5                          | 52.5         | 50.8                                          | 34.7            | 11.0             | 3.5           |

SA=sickness absence, DP=disability pension.

<sup>1</sup>Having DP was defined as  $1 \leq \text{DP net annual days} \leq 364$ . <sup>2</sup>SA spell >14 days after excluding those with full-time DP. <sup>3</sup>Numbers of women in Y<sub>+2</sub> and Y<sub>+3</sub> are lower due to the fact that some died or emigrated during these years.

Comparing crude annual mean net SA and DP days, we found a similar pattern regardless of cohort (Figure 1). Group B0 had the highest mean SA/DP days combined, followed by group B1 and group B1+. The only exception to this was year Y<sub>-1</sub>, that is the year of the first pregnancy for B1 and B1+, when group B0 had the lowest crude number of combined SA and DP days. During all years, the largest difference was found in DP days, where women with no childbirths had up to 10 times the number of DP days as compared to women in group B1+.

1  
2  
3 The standardized mean number of combined SA/DP days showed similar patterns for the  
4 three different cohorts (Figure 2). Women with no childbirths (B0) had the highest number of  
5 SA/DP days at all years except at  $Y_{-1}$ , when B1 had the highest number of SA/DP days,  
6 followed by group B1+. Also for standardized number of days, the largest differences were  
7 seen for DP. Regardless of year, women in B0 had three to ten times more DP days than did  
8 the other groups. SA days were more evenly spread. In Cohort2005 during  $Y_{-3}$  and  $Y_{-2}$  group  
9 B0 and group B1 had similar number of mean SA days (11.3; 10.9 and 11.6; 11.6,  
10 respectively). Women with at least one additional childbirth had fewer mean SA days, 7.0 and  
11 7.5 SA days at  $Y_{-3}$  and  $Y_{-2}$ . The pattern for the association between childbirth and SA/DP was  
12 largely similar across cohorts. There was also an increase in SA and DP over time in all  
13 groups.

14  
15 In the age-stratified analyses for Cohort2005, we found that the youngest women (18-24  
16 years) in B1 had the highest mean SA and DP days, whereas B0 women had the lowest mean  
17 number of corresponding days (Figure 3). Still, B0 women had slightly more DP days,  
18 regardless of year. In the other age groups, B0 women had most DP days during all years, as  
19 compared with B1 and B1+, while women in B1+ had lowest number of SA days during all  
20 years, except during  $Y_{-1}$ . Women aged 30-39 in B0 had the highest mean SA and DP days,  
21 regardless of year. Their combined mean number of SA/DP days varied between 50 and 60,  
22 whereas the range was 30-40 in group B1 and 8-25 in B1+.

## 51 DISCUSSION

52  
53  
54 In this exploratory population-based study using three cohorts from different time periods, we  
55 found that women who had no childbirths had up to ten times higher rates of DP than their  
56 counterparts who gave at least one birth, regardless of cohort and year studied. Women  
57  
58  
59  
60

1  
2  
3 having one additional, subsequent childbirth during follow-up, tended to have fewer days of  
4 combined SA and DP, than women having no childbirths. The findings suggest no period  
5  
6  
7 effects regarding the linkages between childbirth and the investigated outcomes.  
8

9  
10 Our finding that women with no childbirths had higher levels of DP is in line with those of a  
11  
12 Swedish study of twins up to ten years after childbirth, which reported that the number of DP  
13  
14 days was significantly higher in women not giving birth than in their twin sisters who did.<sup>10</sup>  
15

16  
17 Further, this twin study found that except for the year of childbirth, the number of mean  
18  
19 annual SA days (for SA spells >14 days) was similar among women giving birth and those  
20  
21 who did not. Our study showed similar results, except that women who had more than one  
22  
23 childbirth had slightly fewer mean SA days, than the other two groups of women.  
24

25  
26 Women with poor health or other characteristics associated with adverse health may decide  
27  
28 against going through a pregnancy.<sup>19 21</sup> This may be part of the explanation for the  
29  
30 substantially higher levels of DP among women with no childbirths in our study, i.e., a  
31  
32 positive health selection into giving birth, or into having more than one birth is likely, as has  
33  
34 been suggested by others.<sup>10</sup> However, with improvements in medical care, more women with  
35  
36 severe diseases who earlier had to refrain from pregnancy due to disease, might now choose  
37  
38 otherwise. In line with the above mentioned results, a Swedish twin study also indicated a  
39  
40 health selection into giving birth.<sup>11</sup> It also emphasized their findings regarding multiple  
41  
42 hospitalizations before subsequent DP. Future studies with good measures of morbidities  
43  
44 (e.g., in terms of specific medical diagnoses) are needed to more closely investigate the health  
45  
46 selection mechanisms into childbirth.  
47  
48  
49

50  
51 In our study, women aged 30 years or more, with no childbirths, had higher mean SA days  
52  
53 than those with one or more childbirths. Mean number of DP days were higher in all age  
54  
55 groups among women with no childbirths. These findings indicate that the hypothesis of that  
56  
57  
58  
59  
60

1  
2  
3 childbirth leads to more SA<sup>25</sup> strongly can be questioned and that information of DP is also  
4 warranted in studies of SA in women with and without children.

5  
6  
7 We found that women having a subsequent childbirth during the follow-up (B1+), had –  
8 except for the year before delivery – fewer days of both SA and DP up until  $Y_{+1}$  than B0 or  
9  
10 B1 did, but from  $Y_{+2}$  the levels were closer to those in B1, an increase possibly due to a new  
11  
12 pregnancy. This is in accordance with a Norwegian study reporting that the higher SA risk in  
13  
14 women in the years after pregnancy disappeared, when SA during subsequent pregnancies  
15  
16 were accounted for.<sup>15</sup>

17  
18  
19  
20  
21 When we analysed period effects, our results indicated similar patterns between the three  
22  
23 exposure groups regardless of cohort. Nevertheless, the levels of SA/DP combined increased  
24  
25 in a graded manner from Cohort1995 to Cohort2000 and was highest in Cohort2005. Our data  
26  
27 did not allow to investigate the reasons for the increasing SA/DP time trends, but we  
28  
29 speculate that among childbearing women potential explanations may be related to the  
30  
31 increase in age at first childbirth, the better medical care thanks to which women with severe  
32  
33 conditions who earlier refrained from now can engage in pregnancy, as well as better  
34  
35 possibilities to remain in paid work during pregnancy. Nevertheless, the fact that the SA/DP  
36  
37 levels increased over time also among women not giving birth may suggest that factors not  
38  
39 related to childbearing and childrearing may also be important, e.g., changes in mental  
40  
41 disorder rates at the population-level, in possibilities to combine paid and unpaid work and to  
42  
43 remain in employment with certain medical conditions, in physicians' sick-listing practices  
44  
45 and in rules or practices concerning SA and DP at the Social Insurance Agency. Furthermore,  
46  
47 there have been extensive changes in Swedish work life since the 1990s, as in other Western  
48  
49 countries. More organisational instability and downsizing accompanied by a higher  
50  
51 prevalence of adverse psychosocial work situations, have increased the work demands in  
52  
53  
54  
55  
56  
57  
58  
59  
60

1  
2  
3 ways that can interfere with work and family life balance, potentially increasing SA/DP over  
4  
5 time.<sup>28-30</sup>  
6  
7

8 The strengths of this study include its population-based and longitudinal design, and the use  
9  
10 of high-quality and nationwide register data with high completeness, validity and no drop-  
11  
12 outs.<sup>24</sup> The use of National Patient Register data in addition to the MBR allowed us to include  
13  
14 childbirths not captured by the MBR. Furthermore, we were able to account for factors related  
15  
16 both to the occurrence of SA/DP and childbirth such as maternal age, educational level, and  
17  
18 type of living area, by means of a standardized analysis taking these variables into account.  
19  
20 Another strength is related to characteristics of the Swedish labour market and public  
21  
22 insurance system, i.e., high employment rates among women<sup>31</sup> (that is, low health selection  
23  
24 bias) and a public sickness insurance covering basically the whole population. However, two  
25  
26 study limitations warrant consideration in contextualizing the present results. First, women  
27  
28 who had only given birth outside of Sweden would not appear in the registers and may thus,  
29  
30 be incorrectly categorized as not having had any childbirth. This may result in differential  
31  
32 misclassification of exposure, and biased levels of SA/DP in women having no childbirths. To  
33  
34 mitigate this, and to make sure we had information on their possible SA/DP, residency in  
35  
36 Sweden for at least three years prior to childbirth was an inclusion criterion. We had no  
37  
38 information on SA spells <15 days, this can be considered both a limitation and a strength.  
39  
40 The shorter SA spells only represent a limited number of all SA days, and most are self-  
41  
42 reported and not verified by any physician certificate.<sup>32</sup> The underestimation of the mean  
43  
44 yearly SAs is more likely to affect women who gave birth than those who did not since small  
45  
46 children are vulnerable to infections and their parents are likely to catch these; nevertheless,  
47  
48 parents probably choose the social benefits for caring for sick children if they are sick at the  
49  
50 same time as the child.  
51  
52  
53  
54  
55  
56  
57  
58  
59  
60

1  
2  
3 In conclusion, women who had more than one childbirth had – except for the year before  
4 delivery – lower rates and fewer days of both SA and DP, than women with one childbirth  
5 only and women not giving birth. Further, women not giving birth had markedly more DP  
6 days than women who gave birth. These findings are suggestive of a health selection into  
7 childbirth. No period effects in the association between childbirth and these outcomes were  
8 detected. High levels of SA and DP among parous women appear to be mainly restricted to  
9 pregnancy. DP should also be included in studies of SA in relation to childbirth.  
10  
11  
12  
13  
14  
15  
16  
17  
18  
19  
20  
21  
22  
23  
24  
25  
26  
27  
28  
29  
30  
31  
32  
33  
34  
35  
36  
37  
38  
39  
40  
41  
42  
43  
44  
45  
46  
47  
48  
49  
50  
51  
52  
53  
54  
55  
56  
57  
58  
59  
60



1  
2  
3 **Contributors** CB conducted the analyses, wrote the first draft and revised the paper; CO  
4 contributed to analyses and revised the paper; KL contributed to writing, interpretation of the  
5 findings and revised the paper; PS and KA contributed to the conception and design of the  
6 study, interpretation of the findings and revised the paper; MV, UL and PL contributed to the  
7 design of the study, interpretation of the findings and revised the paper. All authors have read  
8 and approved the final version of the manuscript.  
9

10  
11  
12 **Funding** This work was supported by AFA Insurance (grant number 160318). The funder  
13 was not involved in the study design, collection, or analysis of the data, interpretation of the  
14 results, writing of the paper nor in decisions about the manuscript submission.  
15  
16

17  
18 **Competing interests** None declared.  
19

20  
21 **Patient consent for publication** Not applicable.  
22

23  
24 **Ethics approval** The project was approved by the Regional Ethical Review Board of  
25 Stockholm. The Ethical Review Board waived the requirement that informed consent of  
26 research subjects should be obtained.  
27

28  
29 **Data sharing statement** The data used in this study is administered by the Division of  
30 Insurance Medicine, Karolinska Institutet, and cannot be made public. According to the  
31 General Data Protection Regulation, the Swedish law SFS 2018:218, the Swedish Data  
32 Protection Act, the Swedish Ethical Review Act, and the Public Access to Information and  
33 Secrecy Act, these type of sensitive data can only be made available, after legal review, for  
34 researchers who meet the criteria for access to this type of sensitive and confidential data.  
35

36  
37 Readers may contact Professor Kristina Alexanderson ([kristina.alexanderson@ki.se](mailto:kristina.alexanderson@ki.se))  
38 regarding the data.  
39  
40  
41  
42  
43  
44  
45  
46  
47  
48  
49  
50  
51  
52  
53  
54  
55  
56  
57  
58  
59  
60

**REFERENCES**

1. Alexanderson K, Norlund A. Swedish Council on Technology Assessment in Health Care (SBU). Chapter 1. Aim, background, key concepts, regulations, and current statistics. *Scandinavian Journal of Public Health* 2004;**32**(Supplement 63):12-30.
2. Parrukoski S, Lammi Taskula J. Parental leave policies and the economic crisis in the Nordic countries. Helsinki: National Institute for Health and Welfare, 2012.
3. Svedberg P, Ropponen A, Alexanderson K, et al. Genetic susceptibility to sickness absence is similar among women and men: findings from a Swedish twin cohort. *Twin research and human genetics : the official journal of the International Society for Twin Studies* 2012;**15**(5):642-8. doi: 10.1017/thg.2012.47 [published Online First: 2012/08/31]
4. Ugreninov E. Can family policy reduce mothers' sick leave absence? A causal analysis of the Norwegian Paternity Leave Reform. *Journal of Family and Economic Issues* 2013;**34**(4):435-446.
5. Bjorkenstam E, Alexanderson K, Narusyte J, et al. Childbirth, hospitalisation and sickness absence: a study of female twins. *BMJ open* 2015;**5**(1):e006033. doi: 10.1136/bmjopen-2014-006033 [published Online First: 2015/01/13]
6. Brehmer L, Alexanderson K, Schytt E. Days of sick leave and inpatient care at the time of pregnancy and childbirth in relation to maternal age. *Scand J Public Health* 2017;**45**(3):222-29. doi: 10.1177/1403494817693456
7. Mastekaasa A. Sickness absence in female- and male-dominated occupations and workplaces. *Soc Sci Med* 2005;**60**(10):2261-72. doi: 10.1016/j.socscimed.2004.10.003 [published Online First: 2005/03/08]
8. Vistnes JP. Gender differences in days lost from work due to illness. *Ind Labor Relat Rev* 1997;**50**(2):304-23.

- 1  
2  
3 9. Kvinnors sjukfrånvaro- En studie av förstagångsföräldrar. [Women's sick leave: a study of  
4 first-time parents] [in Swedish]. Socialförsäkringsrapport, 2014.  
5  
6
- 7  
8 10. Narusyte J, Björkenstam E, Alexanderson K, et al. Occurrence of sickness absence and  
9 disability pension in relation to childbirth: A 16-year follow-up study of 6323 Swedish  
10 twins. Scand J Public Health 2016;**44**(1):98-105. doi: 10.1177/1403494815610051  
11  
12
- 13  
14 11. Björkenstam E, Narusyte J, Alexanderson K, et al. Associations between childbirth,  
15 hospitalization and disability pension: a cohort study of female twins. PLoS One  
16 2014;**9**(7):e101566. doi: 10.1371/journal.pone.0101566  
17  
18
- 19  
20 12. Soma-Pillay P, Nelson-Piercy C, Tolppanen H, et al. Physiological changes in pregnancy.  
21 Cardiovasc J Afr 2016;**27**(2):89-94. doi: 10.5830/CVJA-2016-021 [published Online  
22 First: 2016/05/24]  
23  
24
- 25  
26 13. Williams D. Pregnancy: a stress test for life. Curr Opin Obstet Gynecol 2003;**15**(6):465-  
27 71. doi: 10.1097/01.gco.0000103846.69273.ba [published Online First: 2003/11/19]  
28  
29
- 30  
31 14. Adams Waldorf KM, Nelson JL. Autoimmune disease during pregnancy and the  
32 microchimerism legacy of pregnancy. Immunol Invest. 2008/08/22 ed, 2008:631-44.  
33  
34
- 35  
36 15. Rieck K, Telle K. Sick leave before, during and after pregnancy. Acta Sociologica  
37 2013;**56**:117-37.  
38  
39
- 40  
41 16. OECD. OECD Family Database 2017 [Available from:  
42 <http://www.oecd.org/social/family/database.htm> accessed 06/30/2017 2017.  
43  
44
- 45  
46 17. The Swedish Medical Birth Register- A summary of content and quality. The National  
47 Board of Health and Welfare: The Centre for Epidemiology, 2003.  
48  
49
- 50  
51 18. Akerlind I, Alexanderson K, Hensing G, et al. Sex differences in sickness absence in  
52 relation to parental status. Scand J Soc Med 1996;**24**(1):27-35. [published Online  
53 First: 1996/03/01]  
54  
55  
56  
57  
58  
59  
60

- 1  
2  
3 19. Bratberg E, Dahl S-A, RA. E. "The double burden": do combinations of career and family  
4 obligations increase sickness absence among women? *Eur Sociol Rev* 2002;**18**:233-  
5  
6 49.  
7  
8  
9
- 10 20. Rikets indelningar: Årsbok över regionala indelningar med koder, postadresser,  
11 telefonnummer m m. 2003 [Country classifications: Yearbook of regional  
12 classifications with codes, postal addresses, phone numbers, etc. 2003] [in Swedish].  
13  
14 Stockholm, 2003.  
15  
16  
17  
18
- 19 21. Mastekaasa A. Parenthood, gender and sickness absence. *Soc Sci Med* 2000;**50**(12):1827-  
20  
21 42. [published Online First: 2000/05/08]  
22  
23
- 24 22. Voss M, Floderus B, Diderichsen F. How do job characteristics, family situation,  
25 domestic work, and lifestyle factors relate to sickness absence? A study based on  
26 Sweden Post. *J Occup Environ Med* 2004;**46**(11):1134-43. [published Online First:  
27  
28 2004/11/10]  
29  
30  
31  
32
- 33 23. Floderus B, Hagman M, Aronsson G, et al. Disability pension among young women in  
34 Sweden, with special emphasis on family structure: a dynamic cohort study. *BMJ*  
35  
36 *Open* 2012;**2**(3) doi: 10.1136/bmjopen-2012-000840 [published Online First:  
37  
38 2012/06/01]  
39  
40  
41
- 42 24. Ludvigsson JF, Almqvist C, Bonamy AK, et al. Registers of the Swedish total population  
43 and their use in medical research. *Eur J Epidemiol* 2016;**31**(2):125-36. doi:  
44  
45 10.1007/s10654-016-0117-y [published Online First: 2016/01/16]  
46  
47  
48
- 49 25. Ludvigsson JF, Svedberg P, Olen O, et al. The longitudinal integrated database for health  
50 insurance and labour market studies (LISA) and its use in medical research. *Eur J*  
51  
52 *Epidemiol* 2019;**34**(4):423-37. doi: 10.1007/s10654-019-00511-8 [published Online  
53  
54 First: 2019/04/01]  
55  
56  
57  
58  
59  
60

- 1  
2  
3 26. Ludvigsson JF, Andersson E, Ekblom A, et al. External review and validation of the  
4  
5 Swedish national inpatient register. *BMC public health* 2011;**11**:450. doi:  
6  
7 10.1186/1471-2458-11-450 [published Online First: 2011/06/11]  
8  
9
- 10 27. MiDAS Sjukpenning och rehabiliteringspenning [The MiDAS register. Sickness absence  
11  
12 benefits] [in Swedish]. The Swedish Social Insurance Agency, 2011.  
13  
14
- 15 28. Rostila M. The Swedish labour market in the 1990s: the very last of the healthy jobs?  
16  
17 *Scand J Public Health* 2008;**36**(2):126-34. doi: 10.1177/1403494807085067  
18  
19 [published Online First: 2008/06/04]  
20  
21
- 22 29. Lidwall U, Bergendorff S, Voss M, et al. Long-term sickness absence: changes in risk  
23  
24 factors and the population at risk. *International journal of occupational medicine and*  
25  
26 *environmental health* 2009;**22**(2):157-68. doi: 10.2478/v10001-009-0018-3 [published  
27  
28 Online First: 2009/07/21]  
29  
30
- 31 30. Bryngelson A, Mittendorfer-Rutz E, Fritzell J, et al. Reduction in personnel and long-term  
32  
33 sickness absence for psychiatric disorders among employees in Swedish county  
34  
35 councils: an ecological population-based study. *Journal of occupational and*  
36  
37 *environmental medicine* 2011;**53**(6):658-62. doi: 10.1097/JOM.0b013e31821aa706  
38  
39 [published Online First: 2011/06/10]  
40  
41
- 42 31. Labour Force Surveys: Fourth Quarter 2017. Stockholm, 2017.  
43  
44
- 45 32. Hensing G, Alexanderson K, Allebeck P, et al. How to measure sickness absence?  
46  
47 Literature review and suggestion of five basic measures. *Scand J Soc Med*  
48  
49 *1998*;**26**(2):133-44. [published Online First: 1998/07/11]  
50  
51  
52  
53  
54  
55  
56  
57  
58  
59  
60

**FIGURE LEGENDS**

Figure 1. Crude mean annual net days of sickness absence (SA) and disability pension (DP) from  $Y_{-3}$  to  $Y_{+3}$ , in Cohort1995, Cohort2000, and Cohort2005, respectively, by childbirth group.

Figure 2. Standardized mean annual net days of sickness absence (SA) and disability pension (DP) from  $Y_{-3}$  to  $Y_{+3}$  in Cohort1995, Cohort2000, and Cohort2005, respectively, by childbirth group.

Figure 3. Crude mean annual net days of sickness absence (SA) and disability pension (DP) from  $Y_{-3}$  to  $Y_{+3}$  in Cohort2005, by age group and childbirth group.

1  
2  
3  
4  
5  
6  
7  
8  
9  
10  
11  
12  
13  
14  
15  
16  
17  
18  
19  
20  
21  
22  
23  
24  
25  
26  
27  
28  
29  
30  
31  
32  
33  
34  
35  
36  
37  
38  
39  
40  
41  
42  
43  
44  
45  
46  
47  
48  
49  
50  
51  
52  
53  
54  
55  
56  
57  
58  
59  
60

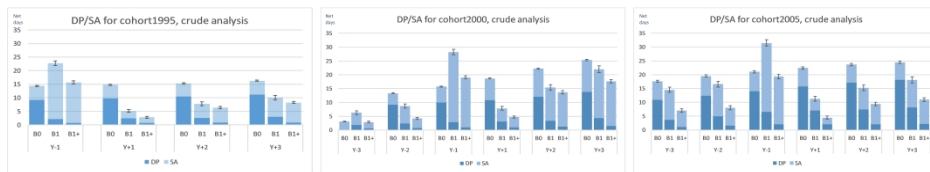

\*The vertical lines represent the confidence interval for the sum of SA and DP net days

929x190mm (300 x 300 DPI)

1  
2  
3  
4  
5  
6  
7  
8  
9  
10  
11  
12  
13  
14  
15  
16  
17  
18  
19  
20  
21  
22  
23  
24  
25  
26  
27  
28  
29  
30  
31  
32  
33  
34  
35  
36  
37  
38  
39  
40  
41  
42  
43  
44  
45  
46  
47  
48  
49  
50  
51  
52  
53  
54  
55  
56  
57  
58  
59  
60

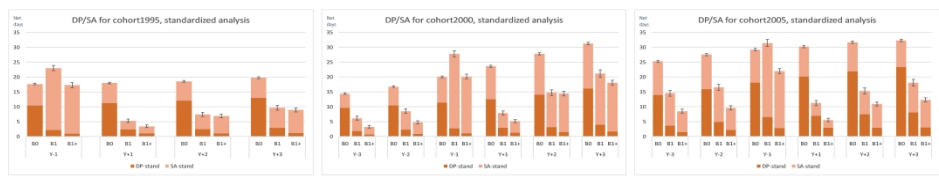

\*The vertical lines represent the confidence interval for the sum of SA and DP net days

929x190mm (300 x 300 DPI)



1  
2  
3  
4  
5  
6  
7  
8  
9  
10  
11  
12  
13  
14  
15  
16  
17  
18  
19  
20  
21  
22  
23  
24  
25  
26  
27  
28  
29  
30  
31  
32  
33  
34  
35  
36  
37  
38  
39  
40  
41  
42  
43  
44  
45  
46  
47  
48  
49  
50  
51  
52  
53  
54  
55  
56  
57  
58  
59  
60

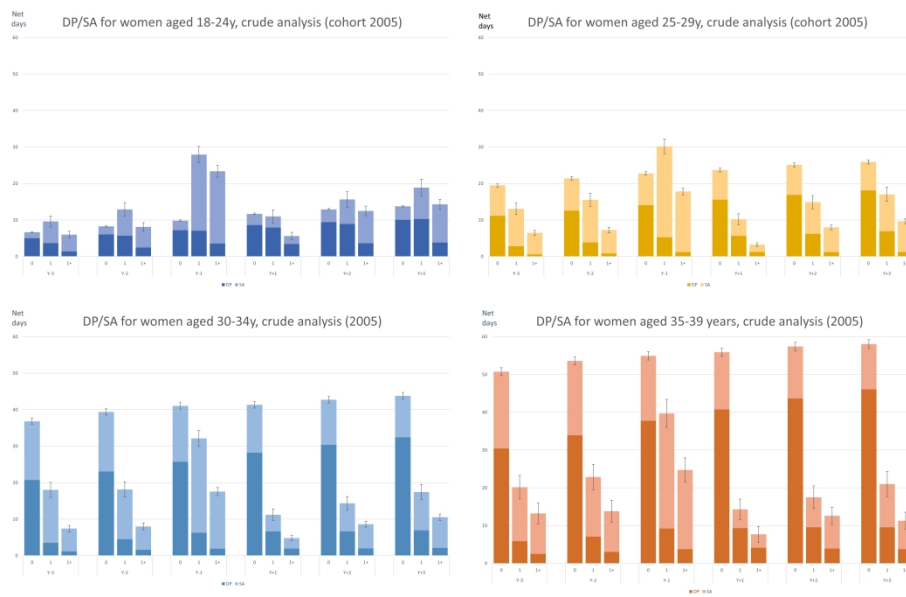

\*The vertical lines represent the confidence interval for the sum of SA and DP net days

603x400mm (300 x 300 DPI)

| STROBE Statement—Checklist of items that should be included in reports of <i>cohort studies</i> |         |                                                                                                                                                                                                   |                    |
|-------------------------------------------------------------------------------------------------|---------|---------------------------------------------------------------------------------------------------------------------------------------------------------------------------------------------------|--------------------|
|                                                                                                 | Item No | Recommendation                                                                                                                                                                                    | Page               |
| <b>Title and abstract</b>                                                                       | 1       | (a) Indicate the study's design with a commonly used term in the title or the abstract                                                                                                            | p. 1, 2            |
|                                                                                                 |         | (b) Provide in the abstract an informative and balanced summary of what was done and what was found                                                                                               | p. 2, 3            |
| <b>Introduction</b>                                                                             |         |                                                                                                                                                                                                   |                    |
| Background/rationale                                                                            | 2       | Explain the scientific background and rationale for the investigation being reported                                                                                                              | p. 4-6             |
| Objectives                                                                                      | 3       | State specific objectives, including any prespecified hypotheses                                                                                                                                  | p. 5-6             |
| <b>Methods</b>                                                                                  |         |                                                                                                                                                                                                   |                    |
| Study design                                                                                    | 4       | Present key elements of study design early in the paper                                                                                                                                           | p. 6-7             |
| Setting                                                                                         | 5       | Describe the setting, locations, and relevant dates, including periods of recruitment, exposure, follow-up, and data collection                                                                   | p. 6-8             |
| Participants                                                                                    | 6       | (a) Give the eligibility criteria, and the sources and methods of selection of participants. Describe methods of follow-up                                                                        | p. 6-8             |
|                                                                                                 |         | (b) For matched studies, give matching criteria and number of exposed and unexposed                                                                                                               | -                  |
| Variables                                                                                       | 7       | Clearly define all outcomes, exposures, predictors, potential confounders, and effect modifiers. Give diagnostic criteria, if applicable                                                          | p. 7, 8            |
| Data sources/<br>measurement                                                                    | 8*      | For each variable of interest, give sources of data and details of methods of assessment (measurement). Describe comparability of assessment methods if there is more than one group              | p. 6-8             |
| Bias                                                                                            | 9       | Describe any efforts to address potential sources of bias                                                                                                                                         | p. 8, 9            |
| Study size                                                                                      | 10      | Explain how the study size was arrived at                                                                                                                                                         | p. 7, 8, 11        |
| Quantitative variables                                                                          | 11      | Explain how quantitative variables were handled in the analyses. If applicable, describe which groupings were chosen and why                                                                      | p. 7-9, 11         |
| Statistical methods                                                                             | 12      | (a) Describe all statistical methods, including those used to control for confounding                                                                                                             | p. 8, 9            |
|                                                                                                 |         | (b) Describe any methods used to examine subgroups and interactions                                                                                                                               | p. 9               |
|                                                                                                 |         | (c) Explain how missing data were addressed                                                                                                                                                       | -                  |
|                                                                                                 |         | (d) If applicable, explain how loss to follow-up was addressed                                                                                                                                    | p. 11              |
|                                                                                                 |         | (e) Describe any sensitivity analyses                                                                                                                                                             | p. 9               |
| <b>Results</b>                                                                                  |         |                                                                                                                                                                                                   |                    |
| Participants                                                                                    | 13*     | (a) Report numbers of individuals at each stage of study—eg numbers potentially eligible, examined for eligibility, confirmed eligible, included in the study, completing follow-up, and analysed | p. 11, 12          |
|                                                                                                 |         | (b) Give reasons for non-participation at each stage                                                                                                                                              | p. 7, 8, 12        |
|                                                                                                 |         | (c) Consider use of a flow diagram                                                                                                                                                                | -                  |
| Descriptive data                                                                                | 14*     | (a) Give characteristics of study participants (eg demographic, clinical, social) and information on exposures and potential confounders                                                          | p. 11              |
|                                                                                                 |         | (b) Indicate number of participants with missing data for each variable of interest                                                                                                               | p. 11              |
|                                                                                                 |         | (c) Summarise follow-up time (eg, average and total amount)                                                                                                                                       | -                  |
| Outcome data                                                                                    | 15*     | Report numbers of outcome events or summary measures over time                                                                                                                                    | p. 12, Figures 1-3 |
| Main results                                                                                    | 16      | (a) Give unadjusted estimates and, if applicable, confounder-adjusted                                                                                                                             | Figures 1-3        |

|                          |    |                                                                                                                                                                            |          |
|--------------------------|----|----------------------------------------------------------------------------------------------------------------------------------------------------------------------------|----------|
|                          |    | estimates and their precision (eg, 95% confidence interval). Make clear which confounders were adjusted for and why they were included                                     |          |
|                          |    | (b) Report category boundaries when continuous variables were categorized                                                                                                  | p. 8, 11 |
|                          |    | (c) If relevant, consider translating estimates of relative risk into absolute risk for a meaningful time period                                                           | -        |
| Other analyses           | 17 | Report other analyses done—eg analyses of subgroups and interactions, and sensitivity analyses                                                                             | p. 12-13 |
| <b>Discussion</b>        |    |                                                                                                                                                                            |          |
| Key results              | 18 | Summarise key results with reference to study objectives                                                                                                                   | p. 13-14 |
| Limitations              | 19 | Discuss limitations of the study, taking into account sources of potential bias or imprecision. Discuss both direction and magnitude of any potential bias                 | p. 16    |
| Interpretation           | 20 | Give a cautious overall interpretation of results considering objectives, limitations, multiplicity of analyses, results from similar studies, and other relevant evidence | p. 13-17 |
| Generalisability         | 21 | Discuss the generalisability (external validity) of the study results                                                                                                      | p. 16    |
| <b>Other information</b> |    |                                                                                                                                                                            |          |
| Funding                  | 22 | Give the source of funding and the role of the funders for the present study and, if applicable, for the original study on which the present article is based              | p. 18    |

\*Give information separately for exposed and unexposed groups.

**Note:** An Explanation and Elaboration article discusses each checklist item and gives methodological background and published examples of transparent reporting. The STROBE checklist is best used in conjunction with this article (freely available on the Web sites of PLoS Medicine at <http://www.plosmedicine.org/>, Annals of Internal Medicine at <http://www.annals.org/>, and Epidemiology at <http://www.epidem.com/>). Information on the STROBE Initiative is available at <http://www.strobe-statement.org>.

# BMJ Open

## Sickness absence and disability pension before and after first childbirth and in nulliparous women: longitudinal analyses of three cohorts in Sweden

|                                 |                                                                                                                                                                                                                                                                                                                                                                                                                                                                  |
|---------------------------------|------------------------------------------------------------------------------------------------------------------------------------------------------------------------------------------------------------------------------------------------------------------------------------------------------------------------------------------------------------------------------------------------------------------------------------------------------------------|
| Journal:                        | <i>BMJ Open</i>                                                                                                                                                                                                                                                                                                                                                                                                                                                  |
| Manuscript ID                   | bmjopen-2019-031593.R2                                                                                                                                                                                                                                                                                                                                                                                                                                           |
| Article Type:                   | Research                                                                                                                                                                                                                                                                                                                                                                                                                                                         |
| Date Submitted by the Author:   | 09-Aug-2019                                                                                                                                                                                                                                                                                                                                                                                                                                                      |
| Complete List of Authors:       | Björkenstam, Charlotte; Karolinska Institute<br>Orellana, Cecilia; Karolinska Institutet<br>Laszlo, Krisztina; Karolinska Institutet, Department of Public Health Sciences<br>Svedberg, Pia; Karolinska Institutet, Department of Clinical Neuroscience<br>Voss, Margaretha; Karolinska Institutet<br>Lidwall, Ulrik; Karolinska Institutet<br>Lindfors, Petra; Stockholm University, Department of Psychology<br>Alexanderson, Kristina; Karolinska Institutet, |
| <b>Primary Subject Heading</b>: | Public health                                                                                                                                                                                                                                                                                                                                                                                                                                                    |
| Secondary Subject Heading:      | Obstetrics and gynaecology                                                                                                                                                                                                                                                                                                                                                                                                                                       |
| Keywords:                       | sick leave, disability pension, childbirth, cohort study, pregnancy, child delivery                                                                                                                                                                                                                                                                                                                                                                              |
|                                 |                                                                                                                                                                                                                                                                                                                                                                                                                                                                  |

SCHOLARONE™  
Manuscripts

1  
2  
3 **Sickness absence and disability pension before and after first**  
4  
5  
6 **childbirth and in nulliparous women: longitudinal analyses of**  
7  
8  
9 **three cohorts in Sweden**  
10  
11  
12  
13  
14

15 Charlotte Björkenstam<sup>1</sup>, Cecilia Orellana<sup>2</sup>, Krisztina D. László<sup>1</sup>, Pia Svedberg<sup>1</sup>, Margaretha  
16 Voss<sup>1</sup>, Ulrik Lidwall<sup>1,3</sup>, Petra Lindfors<sup>4</sup>, Kristina Alexanderson<sup>1</sup>  
17  
18  
19  
20  
21

22 <sup>1</sup>Division of Insurance Medicine, Department of Clinical Neuroscience, Karolinska Institutet,  
23 Stockholm, Sweden  
24  
25

26 <sup>2</sup>Unit of Occupational Medicine, Institute of Environmental Medicine, Karolinska Institutet,  
27 Stockholm, Sweden  
28  
29

30 <sup>3</sup>Department for Analysis and Forecast, Swedish Social Insurance Agency, Stockholm,  
31 Sweden  
32  
33  
34

35 <sup>4</sup>Department of Psychology, Stockholm University, Stockholm, Sweden  
36  
37  
38  
39  
40

41 Correspondence to: Krisztina László  
42

43 Division of Insurance Medicine, Department of Clinical Neuroscience, Karolinska Institutet,  
44 SE-171 77 Stockholm, Sweden  
45  
46

47 E-mail: [krisztina.laszlo@ki.se](mailto:krisztina.laszlo@ki.se); Telephone: +46730209761.  
48  
49  
50  
51  
52  
53  
54  
55

56 Word count for the text: 3589  
57  
58  
59  
60

## ABSTRACT

**Objective** Childbirth is suggested to be associated with elevated levels of sickness absence (SA) and disability pension (DP). However, detailed knowledge about SA/DP patterns around childbirth is lacking. We aimed to compare SA/DP across different time periods among women according to their childbirth status.

**Design** Register-based longitudinal cohort study.

**Setting** Sweden.

**Participants** Three population-based cohorts of nulliparous women aged 18-39 years, living in Sweden 31 December 1994, 1999, or 2004 (nearly 500,000/cohort).

**Primary and secondary outcome measures** Sum of SA>14 and DP net days/year.

**Methods** We compared crude and standardized mean SA and DP days/year during the three years preceding and the three years after first childbirth date ( $Y_{-3}$  to  $Y_{+3}$ ), among women having (1) their first and only birth during the subsequent three years (B1), (2) their first birth and at least another delivery (B1+), and (3) no childbirths during follow-up (B0).

**Results** Despite an increase in SA in the year preceding the first childbirth, women in the B1 group, and especially in B1+, tended to have fewer SA/DP days throughout the years than women in the B0 group. For cohort 2005, the mean SA/DP days/year (95% confidence intervals) in the B0, B1, and B1+ groups were for  $Y_{-3}$ : 25.3 (24.9-25.7), 14.5 (13.6-15.5), and 8.5 (7.9-9.2);  $Y_{-2}$ : 27.5 (27.1-27.9), 16.6 (15.5-17.6), and 9.6 (8.9-10.4);  $Y_{-1}$ : 29.2 (28.8-29.6), 31.4 (30.2-32.6) and 22.0 (21.2-22.9);  $Y_{+1}$ : 30.2 (29.8-30.7), 11.2 (10.4-12.1), and 5.5 (5.0-6.1);  $Y_{+2}$ : 31.7 (31.3-32.1), 15.3 (14.2-16.3), and 10.9 (10.3-11.6);  $Y_{+3}$ : 32.3 (31.9-32.7), 18.1 (17.0-19.3), and 12.4 (11.7-13.0), respectively. These patterns were the same in all three cohorts.

1  
2  
3 **Conclusions** Women with more than one childbirth had fewer SA/DP days/year compared to  
4  
5 women with one childbirth or with no births. Women who did not give birth had markedly  
6  
7 more DP days than those giving birth, suggesting a health selection into childbirth.  
8  
9

10 **Key words** Sick leave, disability pension, childbirth, cohort study, postpartum, pregnancy,  
11  
12 child delivery  
13  
14  
15  
16  
17

#### 18 **Strengths and limitations of this study**

- 19
- 20
- 21 • The study involved longitudinal analyses of both sickness absence and disability  
22 pension.  
23
- 24 • It was population-based, we included virtually all nulliparous women in Sweden  
25 during the study periods.  
26
- 27 • By analysing three cohorts of women five years apart we explored potential time-  
28 period effects.  
29
- 30 • Since we used large, nationwide data, statistical precision in our analyses was high.  
31
- 32 • We had no information on sickness absence spells  $\leq 14$  days.  
33  
34  
35  
36  
37  
38  
39

## BACKGROUND

In many countries with high labour force participation of women, women have higher levels of sickness absence (SA) and disability pension (DP) than men.[1-4] One suggestion to explain this gender difference focuses on SA during pregnancy and after childbirth.[5-8] Also for DP, pregnancy has been suspected to be a factor behind this gender gap, although findings are less consistent than for SA.[8] Swedish studies have shown that women have higher SA during pregnancy, as well as during the years following childbirth, as compared to other years.[5 6 9 10] Yet, it is unclear whether women have elevated rates of SA also during the years preceding their first childbirth. Findings from twin studies, have shown that women who gave birth had lower average number of SA days compared with their nulliparous twin sisters.[5 10 11] After delivery the average number of SA days were similar in both groups. However, few studies have focused on SA and DP in different groups of women; most have focused on gender differences.

Pregnancy and the postpartum period are characterized by important alterations in endocrine, metabolic, immune, and cardiovascular function.[12 13] Changes in immunity in pregnancy may result in higher maternal susceptibility to certain common infectious diseases and in diminished immune responses. This could lead to more severe disease courses in pregnancy, than in the non-pregnant state and consequently to longer SA spells. Similarly, while women's conditions with certain autoimmune diseases improve during pregnancy and may deteriorate after delivery, for others there is a deterioration or no change during gestation.[14] Also, women with a genetic vulnerability or certain risk factors, may experience pregnancy-induced hypertension/preeclampsia, gestational diabetes, peri- and postpartum thrombotic events, or peri- and postpartum psychiatric disorders. Several of these conditions reverse shortly after delivery/the postpartum period, but may reappear later in vulnerable women and



1  
2  
3 result in SA or DP.[13] Women with in vitro fertilization may have increased SA also in the  
4  
5 time preceding conception.  
6

7  
8 Regarding SA, a Norwegian study found that the higher SA risk in women in the years after  
9  
10 pregnancy disappeared when SA during subsequent pregnancies were accounted for.[15]  
11

12  
13 However, this study included mothers only and no information on DP was included, which  
14  
15 means that long-term or permanent reductions in work capacity was not accounted for.  
16

17  
18 The mean age for first childbirth, and the prevalence of several maternal chronic diseases, of  
19  
20 obesity, and in vitro fertilization has increased over the past decades, which may contribute to  
21  
22 an increase in rates over time of certain complications related to pregnancy and childbirth [6  
23  
24 16 17] and subsequently higher SA rates during and shortly after pregnancy.  
25

26  
27 It has also been argued that the combination of paid and unpaid work could be one reason for  
28  
29 women having higher levels of SA and DP than men.[18-20] However, other findings have  
30  
31 reported a positive association between multiple roles and health and well-being,  
32  
33 respectively.[21 22] One exception is single mothers, for whom DP levels according to a  
34  
35 Swedish study are higher than for married or cohabiting mothers, a difference that increases  
36  
37 with the number of children.[23]  
38

39  
40 There might also be a positive health selection into giving birth, where women not giving  
41  
42 birth may have poorer health and thus are unable to, or choose not to give birth.[5 10 11]  
43  
44 However, with these three studies having included twins only, the generalizability to the  
45  
46 general population is unclear.  
47

48  
49 Our aim was to gain knowledge on SA and DP over time in women, in relation to childbirth  
50  
51 while accounting for period effects. Specifically, we wanted to compare annual mean net days  
52  
53 of SA and DP among women giving and not giving birth, covering a period of three years  
54  
55 before and after childbirth. As both childbirth and age are associated with socioeconomic  
56  
57  
58  
59  
60

1  
2  
3 position, another aim was to examine if the association between childbirth and SA/DP varied  
4  
5 between age groups.  
6  
7  
8  
9

## 10 11 12 **METHODS**

13  
14 Longitudinal population-based cohort studies were conducted. We created three different  
15  
16 population-based cohorts, using the unique personal identity number assigned to all residents  
17  
18 in Sweden for linkage of microdata from five Swedish nationwide registers, from the  
19  
20 following three authorities:[24]  
21  
22

23  
24 -From Statistics Sweden: The Longitudinal Integration Database for Health Insurance and  
25  
26 Labor Market Studies (LISA) regarding sociodemographic information, year of immigration,  
27  
28 and emigration.[25]  
29

30  
31 -From the National Board of Health and Welfare: 1) The Medical Birth Register (MBR) for  
32  
33 dates of childbirth and parity. This register covers 97-99% of all births in Sweden since 1973  
34  
35 [17]; 2) the National In-Patient Register for information since 1964 on childbirths not found  
36  
37 in the MBR.[26] We used main or secondary diagnoses related to childbirth (as defined by the  
38  
39 International Classification of Disease (ICD): ICD-7: 660, 670-678; ICD-8: 650-662; ICD-9:  
40  
41 650, 651, 652, 659X, W/659.W-659.X, 669.E,F,G,H,W,X; ICD-10:O75.7-O75.9, O80-84). If  
42  
43 a delivery appeared in both registers, the date from the MBR was used. 3) The Causes of  
44  
45 Death Register for date of death.  
46  
47

48  
49 -From the Swedish Social Insurance Agency, information from their register Micro Data for  
50  
51 Analysis of Social Insurance (MiDAS) on SA and DP (start and end dates and extent) for the  
52  
53 period 1994-2008 [27]. Only SA spells >14 days were included.  
54  
55

56  
57 In Sweden, all individuals aged 16 years or older with income from work, unemployment  
58  
59 benefits, or parental leave benefits, as well as students are entitled to SA benefits from the  
60

1  
2  
3 public sickness insurance system, if their disease or injury is so severe that it has led to work  
4 incapacity in relation to ordinary work duties. There is one waiting day and a physician  
5 certificate is needed from day 8. For employees, sick pay is paid by the employer during the  
6 first 14 days of a SA spell. People aged 19-64 who, due to disease or injury have a long-term  
7 or permanently reduced work capacity can be granted DP. Both SA and DP can be granted for  
8 full- or part-time (25%, 50% or 75%) of ordinary work hours. Approximately 80% of the lost  
9 income, up to a certain limit, is covered by SA benefits, while DP covers up to 65%. If on  
10 parental leave at the time of disease or injury, the parent may receive SA benefits (instead of  
11 parental leave benefits) in circumstances that involve hospital care or if due to the morbidity  
12 he/she cannot take care of the child. Women on full or partial DP before giving birth remain  
13 on DP also after giving birth. Parents can stay home to care for a sick child for 60  
14 days/year/child, with benefits at the same level as SA. There is no waiting day. The number of  
15 days can be prolonged in the case of severe disease of the child (e.g., cancer).

### 35 Cohorts

36  
37 We created three cohorts (Cohort1995, Cohort2000, Cohort2005) of all women living in  
38 Sweden and aged 18-39 years on 31 December 1994, 1999, or 2004, respectively, using the  
39 LISA register. To study SA and DP during the three years prior to three years after first child  
40 delivery date ( $T_0$ ), and to allow comparisons with women not having any births during this  
41 period, we only included women who resided in Sweden during the three years prior to the  
42 respective inclusion year. To handle that the outcome (SA/DP) might be influenced by a new  
43 pregnancy, all women were followed up also for a new childbirth in the 43 weeks after  $Y_{+3}$ .  
44 For each cohort, we identified three groups of women:

- 45 • B0: Women having no childbirths registered neither before nor during the follow-up.

- B1: Women having their first childbirth during the index year and no additional births registered during the follow-up.
- B1+: Women having their first childbirth during the index year and at least one more birth during the follow-up.

Thus, all women with a childbirth prior to the index year (1995, 2000, or 2005) were excluded. For the women in B0,  $T_0$  was set to 2 July of each index year.

## Outcome

We calculated the number of annual mean net SA and DP days for each of the three years preceding  $T_0$  and the three years after, for each cohort, respectively. However, as data on SA and DP was only available from 1994, only one year prior to  $T_0$  was considered for Cohort1995. Part-time SA/DP days were combined, e.g., two days of half-time SA or DP was counted as one net day.

## Sociodemographics

The following covariates were included: age (categorized into four groups: 18-24, 25-29, 30-34, and 35-39 years), country of birth (Sweden, other Scandinavian country, other EU 25, and rest of the world), type of living area (based on the H-classification scheme[20]), categorized as: large city (Stockholm, Gothenburg, Malmö); medium-sized city ( $\geq 90,000$  inhabitants); and small city/village ( $< 90,000$  inhabitants)), family situation (married/cohabitant and single), and educational level (categorized as elementary ( $\leq 9$  years), high school (10–12 years), and university/college ( $> 12$  years)). These variables were obtained from the LISA register and were measured on 31 December 1994, 1999, and 2004, respectively.

## Statistical analyses

We calculated annual mean numbers of net SA and DP days, starting three years preceding the date of the first childbirth ( $Y_{-3}$ ) until three years after ( $Y_{+3}$ ) for the three comparisons groups (B0, B1, B1+) within each cohort. Both crude and standardized mean numbers of net days were calculated. We used a direct standardization using Cohort2005 as the standard population. In the standardization, all sociodemographic variables were taken into account; age (in four categories), country of birth, place of residence, educational level, and family status (as binary). Women who died or emigrated within three years after child delivery were excluded from the analyses from the year after death or emigration.

Further, for Cohort2005, we calculated the proportion of all women who had DP or at least one SA spell >14 days, respectively, and also the proportion of women with SA among those who had no DP.

As age is strongly associated with both SA/DP and childbirth,[6] we also performed analyses stratified by age for Cohort2005, calculating 95% confidence intervals (CI) for the means of the sums of SA and DP net days. All analyses were conducted using SAS 9.4.

The project was approved by the Regional Ethical Review Board in Stockholm, Sweden.

## Patient and public involvement

The study participants or the general public were not involved in decisions about the research question, the design of the study, the outcomes, the conduct of the study, the drafting of the paper, nor in the dissemination of the study results.

## RESULTS

In all three cohorts, 92-93% of the women had no childbirths, that is, they belonged to the group B0 (Table 1). Around 13,000 to 15,000 women had had their first childbirth during the index year (3%) but no more births during the study period, i.e., belonged to group B1. About 21,000 to 25,000 women belonged to B1+, i.e., had their first delivery during the index year and at least one additional childbirth during follow-up (4-5%). Women in B0 were younger (18-24 years), had lower educational level, and were to a higher extent single. A lower rate of women in B1+ were in the oldest age group (i.e., 35-39 years), as compared to women in B0 and B1. Furthermore, women in group B1+ were more likely to have higher education and to be married or cohabiting, than those in B0 and B1.

For Cohort2005, women in B1 had the highest proportion of SA/DP combined during  $Y_{-3}$  to  $Y_{-1}$ , as well as the highest proportion of SA between  $Y_{-3}$  to  $Y_{+1}$ , while B1+ had both highest proportion of SA/DP combined and SA the other years (Table 2). The highest proportions of women on DP were found for B0 during all years, ranging from 3.4% to 5.8%. Among DP recipients, the proportion on part-time DP was lowest in B0 and highest in B1+ (Table 2).

Among SA recipients, women in B1+ were more likely to have shorter SA spells than women in B0 or B1+ (Table 2).

**Table 1.** Characteristics of the three cohorts of women, by cohort and childbirth group<sup>1</sup>.

|                                | Cohort 1995 (N=486,628) |                 |                  | Cohort 2000 (N=490,878) |       |       | Cohort 2005 (N=492,504) |       |       |
|--------------------------------|-------------------------|-----------------|------------------|-------------------------|-------|-------|-------------------------|-------|-------|
|                                | B0 <sup>1</sup>         | B1 <sup>1</sup> | B1+ <sup>1</sup> | B0                      | B1    | B1+   | B0                      | B1    | B1+   |
| N                              | 450630                  | 15096           | 20902            | 455962                  | 13569 | 21347 | 453532                  | 14299 | 24673 |
| <b>Age (years)</b>             |                         |                 |                  |                         |       |       |                         |       |       |
| 18-24                          | 58.1                    | 36.2            | 35.3             | 55.4                    | 29.4  | 25.6  | 56.7                    | 25.8  | 21.4  |
| 25-29                          | 19.9                    | 35.5            | 43.7             | 21.6                    | 36.0  | 46.2  | 20.4                    | 32.1  | 42.0  |
| 30-34                          | 11.9                    | 20.1            | 17.7             | 12.4                    | 24.4  | 23.8  | 12.4                    | 28.6  | 30.9  |
| 35-39                          | 10.1                    | 8.2             | 3.3              | 10.6                    | 10.2  | 4.4   | 10.5                    | 13.5  | 5.8   |
| <b>Country of birth</b>        |                         |                 |                  |                         |       |       |                         |       |       |
| Sweden                         | 90.5                    | 91.1            | 94.0             | 89.0                    | 88.2  | 93.0  | 87.6                    | 86.6  | 91.5  |
| Other Scandinavian country     | 2.2                     | 2.6             | 1.7              | 1.4                     | 1.7   | 1.2   | 1.1                     | 1.4   | 1.0   |
| Other EU 25                    | 1.6                     | 1.3             | 0.8              | 1.5                     | 1.3   | 0.8   | 1.6                     | 1.5   | 1.0   |
| Rest of the world              | 5.7                     | 5.0             | 3.5              | 8.1                     | 8.8   | 5.0   | 9.7                     | 10.5  | 6.5   |
| <b>Type of living area</b>     |                         |                 |                  |                         |       |       |                         |       |       |
| Large cities                   | 41.7                    | 39.7            | 37.0             | 43.3                    | 41.6  | 41.4  | 43.4                    | 43.8  | 44.1  |
| Medium-sized cities            | 34.9                    | 34.9            | 35.4             | 35.1                    | 34.5  | 34.2  | 35.7                    | 33.7  | 34.2  |
| Small cities/village           | 23.4                    | 25.4            | 27.6             | 21.7                    | 23.9  | 24.4  | 20.9                    | 22.5  | 21.8  |
| <b>Educational level</b>       |                         |                 |                  |                         |       |       |                         |       |       |
| Elementary school (≤9 years)   | 19.4                    | 15.3            | 9.2              | 21.9                    | 18.5  | 9.6   | 20.0                    | 12.7  | 7.1   |
| High school (10-12 years)      | 57.2                    | 60.0            | 57.3             | 49.5                    | 52.7  | 48.1  | 45.9                    | 47.2  | 38.6  |
| University/college (≥13 years) | 23.4                    | 24.7            | 33.5             | 28.6                    | 28.8  | 42.3  | 34.1                    | 40.1  | 54.3  |
| <b>Family situation</b>        |                         |                 |                  |                         |       |       |                         |       |       |
| Married or cohabitant          | 6.0                     | 22.0            | 28.7             | 5.1                     | 22.3  | 29.2  | 4.5                     | 22.5  | 27.7  |
| Single                         | 94.0                    | 78.0            | 71.3             | 94.9                    | 77.7  | 70.8  | 95.5                    | 77.5  | 72.3  |

<sup>1</sup>B0=No childbirth during follow-up, B1=First childbirth during index year (at date T<sub>0</sub>) of each cohort and no more children during follow-up, B1+=First childbirth at T<sub>0</sub> and at least one more during follow-up.

**Table 2.** Proportion of women with a sickness absence spell >14 days and disability pension during the six different years before and after childbirth, for Cohort2005, by childbirth group

| Year                         | Childbirth group | Total study population |                        |                     |                     | Of DP recipients, received DP |              | Of SA recipients, received SA for a period of |                 |                  |               |
|------------------------------|------------------|------------------------|------------------------|---------------------|---------------------|-------------------------------|--------------|-----------------------------------------------|-----------------|------------------|---------------|
|                              |                  | N                      | SA/DP <sup>1</sup> (%) | DP <sup>1</sup> (%) | SA <sup>2</sup> (%) | Part of the year (%)          | All year (%) | >0-30 days (%)                                | >30-90 days (%) | >90-180 days (%) | >180 days (%) |
| Y <sub>-3</sub>              | B0               | 453532                 | 9.5                    | 3.4                 | 6.6                 | 26.8                          | 73.2         | 40.0                                          | 22.8            | 13.6             | 23.6          |
|                              | B1               | 14299                  | 12.6                   | 1.4                 | 11.6                | 53.8                          | 46.2         | 43.1                                          | 22.6            | 14.9             | 19.4          |
|                              | B1+              | 24673                  | 8.9                    | 0.5                 | 8.6                 | 63.4                          | 36.6         | 51.0                                          | 24.0            | 12.7             | 12.3          |
| Y <sub>-2</sub>              | B0               | 453532                 | 9.5                    | 3.9                 | 6.2                 | 24.3                          | 75.7         | 34.2                                          | 23.3            | 14.8             | 27.7          |
|                              | B1               | 14299                  | 12.7                   | 2.0                 | 11.4                | 52.8                          | 47.2         | 40.8                                          | 22.3            | 14.1             | 22.8          |
|                              | B1+              | 24673                  | 8.6                    | 0.7                 | 8.1                 | 60.9                          | 39.1         | 45.7                                          | 25.5            | 13.8             | 14.9          |
| Y <sub>-1</sub>              | B0               | 453532                 | 10.3                   | 4.5                 | 6.5                 | 25.5                          | 74.5         | 36.3                                          | 23.6            | 15.3             | 24.8          |
|                              | B1               | 14299                  | 36.2                   | 2.4                 | 35.0                | 44.7                          | 55.3         | 37.8                                          | 36.9            | 15.8             | 9.5           |
|                              | B1+              | 24673                  | 30.6                   | 0.8                 | 30.2                | 50.8                          | 49.2         | 45.4                                          | 35.8            | 13.3             | 5.6           |
| Y <sub>+1</sub>              | B0               | 453532                 | 11.1                   | 5.0                 | 6.9                 | 25.5                          | 74.5         | 41.1                                          | 23.2            | 13.9             | 21.9          |
|                              | B1               | 14299                  | 10.7                   | 2.4                 | 8.7                 | 36.2                          | 63.8         | 61.5                                          | 22.5            | 8.4              | 7.7           |
|                              | B1+              | 24673                  | 6.8                    | 0.8                 | 6.1                 | 49.7                          | 50.3         | 67.9                                          | 20.2            | 6.5              | 5.4           |
| Y <sub>+2</sub> <sup>3</sup> | B0               | 448921                 | 11.8                   | 5.4                 | 7.3                 | 26.5                          | 73.5         | 43.1                                          | 22.6            | 13.7             | 20.6          |
|                              | B1               | 14270                  | 10.7                   | 2.6                 | 8.7                 | 37.1                          | 62.9         | 44.1                                          | 21.5            | 14.1             | 20.3          |
|                              | B1+              | 24671                  | 15.1                   | 0.8                 | 14.5                | 45.4                          | 54.6         | 50.4                                          | 33.4            | 11.7             | 4.6           |
| Y <sub>+3</sub> <sup>3</sup> | B0               | 443320                 | 12.0                   | 5.8                 | 7.1                 | 27.1                          | 72.9         | 43.7                                          | 23.1            | 13.2             | 20.0          |
|                              | B1               | 14183                  | 12.7                   | 2.9                 | 10.6                | 43.0                          | 57.0         | 44.7                                          | 20.9            | 13.2             | 21.1          |
|                              | B1+              | 24667                  | 19.1                   | 0.8                 | 18.5                | 47.5                          | 52.5         | 50.8                                          | 34.7            | 11.0             | 3.5           |

SA=sickness absence, DP=disability pension.

<sup>1</sup>Having DP was defined as  $1 \leq \text{DP net annual days} \leq 364$ . <sup>2</sup>SA spell >14 days after excluding those with full-time DP. <sup>3</sup>Numbers of women in Y<sub>+2</sub> and Y<sub>+3</sub> are lower due to the fact that some died or emigrated during these years.

Comparing crude annual mean net SA and DP days, we found a similar pattern regardless of cohort (Figure 1). Group B0 had the highest mean SA/DP days combined, followed by group B1 and group B1+. The only exception to this was year Y<sub>-1</sub>, that is the year of the first pregnancy for B1 and B1+, when group B0 had the lowest crude number of combined SA and DP days. During all years, the largest difference was found in DP days, where women with no childbirths had up to 10 times the number of DP days as compared to women in group B1+.



1  
2  
3 The standardized mean number of combined SA/DP days showed similar patterns for the  
4 three different cohorts (Figure 2). Women with no childbirths (B0) had the highest number of  
5 SA/DP days at all years except at  $Y_{-1}$ , when B1 had the highest number of SA/DP days,  
6 followed by group B1+. Also for standardized number of days, the largest differences were  
7 seen for DP. Regardless of year, women in B0 had three to ten times more DP days than did  
8 the other groups. SA days were more evenly spread. In Cohort2005 during  $Y_{-3}$  and  $Y_{-2}$  group  
9 B0 and group B1 had similar number of mean SA days (11.3; 10.9 and 11.6; 11.6,  
10 respectively). Women with at least one additional childbirth had fewer mean SA days, 7.0 and  
11 7.5 SA days at  $Y_{-3}$  and  $Y_{-2}$ . The pattern for the association between childbirth and SA/DP was  
12 largely similar across cohorts. There was also an increase in SA and DP over time in all  
13 groups.  
14

15  
16 In the age-stratified analyses for Cohort2005, we found that the youngest women (18-24  
17 years) in B1 had the highest mean SA and DP days, whereas B0 women had the lowest mean  
18 number of corresponding days (Figure 3). Still, B0 women had slightly more DP days,  
19 regardless of year. In the other age groups, B0 women had most DP days during all years, as  
20 compared with B1 and B1+, while women in B1+ had lowest number of SA days during all  
21 years, except during  $Y_{-1}$ . Women aged 30-39 in B0 had the highest mean SA and DP days,  
22 regardless of year. Their combined mean number of SA/DP days varied between 50 and 60,  
23 whereas the range was 30-40 in group B1 and 8-25 in B1+.  
24  
25  
26  
27  
28  
29  
30  
31  
32  
33  
34  
35  
36  
37  
38  
39  
40  
41  
42  
43  
44  
45  
46  
47  
48  
49  
50

## 51 DISCUSSION

52  
53  
54 In this exploratory population-based study using three cohorts from different time periods, we  
55 found that women who had no childbirths had up to ten times higher rates of DP than their  
56 counterparts who gave at least one birth, regardless of cohort and year studied. Women  
57  
58  
59  
60

1  
2  
3 having one additional, subsequent childbirth during follow-up, tended to have fewer days of  
4 combined SA and DP, than women having no childbirths. The findings suggest no period  
5  
6  
7 effects regarding the linkages between childbirth and the investigated outcomes.  
8

9  
10 Our finding that women with no childbirths had higher levels of DP is in line with those of a  
11  
12 Swedish study of twins up to ten years after childbirth, which reported that the number of DP  
13  
14 days was significantly higher in women not giving birth than in their twin sisters who did.[10]  
15

16  
17 Further, that twin study found that except for the year of childbirth, the number of mean  
18  
19 annual SA days (for SA spells >14 days) was similar among women giving birth and those  
20  
21 who did not. Our study showed similar results, except that women who had more than one  
22  
23 childbirth had slightly fewer mean SA days, than the other two groups of women.  
24

25  
26 Women with poor health or other characteristics associated with adverse health may decide  
27  
28 against going through a pregnancy.[19 21] This may be part of the explanation for the  
29  
30 substantially higher levels of DP among women with no childbirths in our study, i.e., a  
31  
32 positive health selection into giving birth or into having more than one birth is likely, as has  
33  
34 been suggested by others.[10] However, with improvements in medical care, more women  
35  
36 with severe diseases who earlier had to refrain from pregnancy due to disease, might now  
37  
38 choose otherwise. In line with the above mentioned results, a Swedish twin study also  
39  
40 indicated a health selection into giving birth.[11] It also emphasized their findings regarding  
41  
42 multiple hospitalizations before subsequent DP. Future studies with good measures of  
43  
44 morbidities (e.g., in terms of specific medical diagnoses) are needed to more closely  
45  
46 investigate the health selection mechanisms into childbirth.  
47  
48  
49

50  
51 In our study, women aged 30 years or more, with no childbirths, had higher mean SA days  
52  
53 than those with one or more childbirths. Mean number of DP days were higher in all age  
54  
55 groups among women with no childbirths. These findings indicate that the hypothesis of that  
56  
57  
58  
59  
60

1  
2  
3 childbirth leads to more SA [28] strongly can be questioned and that information of DP is also  
4 warranted in studies of SA in women with and without children.  
5

6  
7 We found that women having a subsequent childbirth during the follow-up (B1+), had –  
8 except for the year before delivery – fewer days of both SA and DP up until  $Y_{+1}$  than B0 or  
9  
10 B1 did, but from  $Y_{+2}$  the levels were closer to those in B1, an increase possibly due to a new  
11 pregnancy. This is in accordance with a Norwegian study reporting that the higher SA risk in  
12 women in the years after pregnancy disappeared, when SA during subsequent pregnancies  
13 were accounted for.[15] As expected, those who gave birth had lower SA in the year after  
14 childbirth ( $Y_{+1}$ ) as most women are on parental leave for at least some months in that  
15 year.[28] Even if it is possible to claim SA benefits also when on parental leave, this is not  
16 usual, unless the morbidity leads to not being able to care for the child.  
17  
18

19  
20 When we analysed period effects, our results indicated similar patterns between the three  
21 exposure groups regardless of cohort. Nevertheless, the levels of SA/DP combined increased  
22 in a graded manner from Cohort1995 to Cohort2000 and was highest in Cohort2005. Our data  
23 did not allow to investigate the reasons for the increasing SA/DP time trends, but we  
24 speculate that among childbearing women potential explanations may be related to the  
25 increase in age at first childbirth, the better medical care thanks to which women with severe  
26 conditions who earlier refrained from now can engage in pregnancy, as well as better  
27 possibilities to remain in paid work during pregnancy. Nevertheless, the fact that the SA/DP  
28 levels increased over time also among women not giving birth may suggest that factors not  
29 related to childbearing and childrearing may also be important, e.g., changes in mental  
30 disorder rates at the population-level, in possibilities to combine paid and unpaid work and to  
31 remain in employment with certain medical conditions, in physicians' sick-listing practices,  
32 and in rules or practices concerning SA and DP at the Social Insurance Agency. Furthermore,  
33 there have been extensive changes in Swedish work life since the 1990s, as in other Western  
34  
35  
36  
37  
38  
39  
40  
41  
42  
43  
44  
45  
46  
47  
48  
49  
50  
51  
52  
53  
54  
55  
56  
57  
58  
59  
60

1  
2  
3 countries. More organisational instability and downsizing accompanied by a higher  
4 prevalence of adverse psychosocial work situations, have increased the work demands in  
5 ways that can interfere with work and family life balance, potentially increasing SA/DP over  
6 time.[29-31]  
7  
8  
9

10  
11  
12 The strengths of this study include its population-based and longitudinal design, and the use  
13 of high-quality and nationwide register data with high completeness, validity and no drop-  
14 outs.[24] The use of National Patient Register data in addition to the MBR allowed us to  
15 include childbirths not captured by the MBR. Furthermore, we were able to account for  
16 factors related both to the occurrence of SA/DP and childbirth such as maternal age,  
17 educational level, and type of living area, by means of a standardized analysis taking these  
18 variables into account. Another strength is related to characteristics of the Swedish labour  
19 market and public insurance system, i.e., high employment rates among women [32] (that is,  
20 low health selection bias) and a public sickness insurance covering basically the whole  
21 population. However, two study limitations warrant consideration in contextualizing the  
22 present results. First, women who had only given birth outside of Sweden would not appear in  
23 the registers and may thus, be incorrectly categorized as not having had any childbirth. This  
24 may result in differential misclassification of exposure, and biased levels of SA/DP in women  
25 having no childbirths. To mitigate this, and to make sure we had information on their possible  
26 SA/DP, residency in Sweden for at least three years prior to childbirth was an inclusion  
27 criterion. We had no information on SA spells <15 days, this can be considered both a  
28 limitation and a strength. The shorter SA spells only represent a limited number of all SA  
29 days, and most are self-reported and not verified by any physician certificate.[33] The  
30 underestimation of the mean yearly SAs is more likely to affect women who gave birth than  
31 those who did not since small children are vulnerable to infections and their parents are likely  
32 to catch these; nevertheless, parents probably choose the very generous social benefits for  
33  
34  
35  
36  
37  
38  
39  
40  
41  
42  
43  
44  
45  
46  
47  
48  
49  
50  
51  
52  
53  
54  
55  
56  
57  
58  
59  
60

1  
2  
3 caring for sick children if they were sick at the same time as the child. We had no information  
4  
5 on if and in that case how much the women in the three groups were in paid work, studying,  
6  
7 or on different types of parental leave during the studied years.  
8  
9

10 In conclusion, women who had more than one childbirth had – except for the year before  
11  
12 delivery – lower rates and fewer days of both SA and DP, than women with one childbirth  
13  
14 only and women not giving birth. Further, women not giving birth had markedly more DP  
15  
16 days than women who gave birth. These findings are suggestive of a health selection into  
17  
18 childbirth. No period effects in the association between childbirth and these outcomes were  
19  
20 detected. High levels of SA and DP among parous women appear to be mainly restricted to  
21  
22 pregnancy. DP should also be included in studies of SA in relation to childbirth.  
23  
24  
25  
26  
27  
28  
29  
30  
31  
32  
33  
34  
35  
36  
37  
38  
39  
40  
41  
42  
43  
44  
45  
46  
47  
48  
49  
50  
51  
52  
53  
54  
55  
56  
57  
58  
59  
60

1  
2  
3 **Contributors** CB conducted the analyses, wrote the first draft and revised the paper; CO  
4 contributed to analyses and revised the paper; KL contributed to writing, interpretation of the  
5 findings and revised the paper; PS and KA contributed to the conception and design of the  
6 study, interpretation of the findings and revised the paper; MV, UL and PL contributed to the  
7 design of the study, interpretation of the findings and revised the paper. All authors have read  
8 and approved the final version of the manuscript.  
9

10  
11  
12 **Funding** This work was supported by AFA Insurance (grant number 160318). The funder  
13 was not involved in the study design, collection, or analysis of the data, interpretation of the  
14 results, writing of the paper nor in decisions about the manuscript submission.  
15  
16

17  
18 **Competing interests** None declared.  
19

20  
21 **Patient consent for publication** Not applicable.  
22

23  
24 **Ethics approval** The project was approved by the Regional Ethical Review Board of  
25 Stockholm. The Ethical Review Board waived the requirement that informed consent of  
26 research subjects should be obtained.  
27

28  
29 **Data sharing statement** The data used in this study is administered by the Division of  
30 Insurance Medicine, Karolinska Institutet, and cannot be made public. According to the  
31 General Data Protection Regulation, the Swedish law SFS 2018:218, the Swedish Data  
32 Protection Act, the Swedish Ethical Review Act, and the Public Access to Information and  
33 Secrecy Act, these type of sensitive data can only be made available, after legal review, for  
34 researchers who meet the criteria for access to this type of sensitive and confidential data.  
35

36  
37 Readers may contact Professor Kristina Alexanderson ([kristina.alexanderson@ki.se](mailto:kristina.alexanderson@ki.se))  
38 regarding the data.  
39  
40  
41  
42  
43  
44  
45  
46  
47  
48  
49  
50  
51  
52  
53  
54  
55  
56  
57  
58  
59  
60

**REFERENCES**

1. Alexanderson K, Norlund A. Swedish Council on Technology Assessment in Health Care (SBU). Chapter 1. Aim, background, key concepts, regulations, and current statistics. *Scandinavian Journal of Public Health* 2004;**32**(Supplement 63):12-30
2. Parrukoski S, Lammi Taskula J. Parental leave policies and the economic crisis in the Nordic countries. Helsinki: National Institute for Health and Welfare, 2012.
3. Svedberg P, Ropponen A, Alexanderson K, et al. Genetic susceptibility to sickness absence is similar among women and men: findings from a Swedish twin cohort. *Twin research and human genetics : the official journal of the International Society for Twin Studies* 2012;**15**(5):642-8 doi: 10.1017/thg.2012.47[published Online First: Epub Date]].
4. Ugreninov E. Can family policy reduce mothers' sick leave absence? A causal analysis of the Norwegian Paternity Leave Reform. *Journal of Family and Economic Issues* 2013;**34**(4):435-446.
5. Björkenstam E, Alexanderson K, Narusyte J, et al. Childbirth, hospitalisation and sickness absence: a study of female twins. *BMJ Open* 2015;**5**(1):e006033 doi: 10.1136/bmjopen-2014-006033[published Online First: Epub Date]].
6. Brehmer L, Alexanderson K, Schytt E. Days of sick leave and inpatient care at the time of pregnancy and childbirth in relation to maternal age. *Scand J Public Health* 2017;**45**(3):222-29 doi: 10.1177/1403494817693456[published Online First: Epub Date]].
7. Mastekaasa A. Sickness absence in female- and male-dominated occupations and workplaces. *Soc Sci Med* 2005;**60**(10):2261-72 doi: 10.1016/j.socscimed.2004.10.003[published Online First: Epub Date]].

- 1  
2  
3 8. Vistnes JP. Gender differences in days lost from work due to illness. *Ind. Labor Relat. Rev.*  
4  
5 1997;**50**(2):304-23  
6  
7
- 8 9. Kvinnors sjukfrånvaro- En studie av förstagångsföräldrar. [Women's sick leave: a study of  
9  
10 first-time parents] [in Swedish]. Socialförsäkringsrapport, 2014.  
11
- 12 10. Narusyte J, Björkenstam E, Alexanderson K, et al. Occurrence of sickness absence and  
13  
14 disability pension in relation to childbirth: A 16-year follow-up study of 6323 Swedish  
15  
16 twins. *Scand J Public Health* 2016;**44**(1):98-105 doi:  
17  
18 10.1177/1403494815610051[published Online First: Epub Date]].  
19
- 20 21 11. Björkenstam E, Narusyte J, Alexanderson K, et al. Associations between childbirth,  
22  
23 hospitalization and disability pension: a cohort study of female twins. *PLoS One*  
24  
25 2014;**9**(7):e101566 doi: 10.1371/journal.pone.0101566[published Online First: Epub  
26  
27 Date]].  
28  
29
- 30 31 12. Soma-Pillay P, Nelson-Piercy C, Tolppanen H, et al. Physiological changes in pregnancy.  
32  
33 *Cardiovasc J Afr* 2016;**27**(2):89-94 doi: 10.5830/CVJA-2016-021[published Online  
34  
35 First: Epub Date]].  
36
- 37 38 13. Williams D. Pregnancy: a stress test for life. *Curr Opin Obstet Gynecol* 2003;**15**(6):465-  
39  
40 71 doi: 10.1097/01.gco.0000103846.69273.ba[published Online First: Epub Date]].  
41
- 42 43 14. Adams Waldorf KM, Nelson JL. Autoimmune disease during pregnancy and the  
44  
45 microchimerism legacy of pregnancy. *Immunol Invest.* 2008/08/22 ed, 2008:631-44.  
46
- 47 48 15. Rieck K, Telle K. Sick leave before, during and after pregnancy. *Acta Sociologica*  
49  
50 2013;**56**:117-37  
51
- 52 53 16. OECD. OECD Family Database. Secondary OECD Family Database 2017. Available  
54  
55 from: <http://www.oecd.org/social/family/database.htm> accessed 06/30/2017 2017  
56
- 57 58 17. The Swedish Medical Birth Register- A summary of content and quality. The National  
59  
60 Board of Health and Welfare: The Centre for Epidemiology, 2003.



- 1  
2  
3 18. Akerlind I, Alexanderson K, Hensing G, et al. Sex differences in sickness absence in  
4 relation to parental status. *Scand J Soc Med* 1996;**24**(1):27-35  
5  
6  
7 19. Bratberg E, Dahl S-A, RA. E. "The double burden": do combinations of career and family  
8 obligations increase sickness absence among women? *Eur Sociol Rev* 2002;**18**:233-49  
9  
10  
11 20. Rikets indelningar: Årsbok över regionala indelningar med koder, postadresser,  
12 telefonnummer m m. 2003 [Country classifications: Yearbook of regional  
13 classifications with codes, postal addresses, phone numbers, etc. 2003] [in Swedish].  
14 Stockholm, 2003.  
15  
16  
17 21. Mastekaasa A. Parenthood, gender and sickness absence. *Soc Sci Med* 2000;**50**(12):1827-  
18 42  
19  
20  
21 22. Voss M, Floderus B, Diderichsen F. How do job characteristics, family situation,  
22 domestic work, and lifestyle factors relate to sickness absence? A study based on  
23 Sweden Post. *J Occup Environ Med* 2004;**46**(11):1134-43  
24  
25  
26 23. Floderus B, Hagman M, Aronsson G, et al. Disability pension among young women in  
27 Sweden, with special emphasis on family structure: a dynamic cohort study. *BMJ*  
28 *Open* 2012;**2**(3) doi: 10.1136/bmjopen-2012-000840[published Online First: Epub  
29 Date]].  
30  
31  
32 24. Ludvigsson JF, Almqvist C, Bonamy AK, et al. Registers of the Swedish total population  
33 and their use in medical research. *Eur J Epidemiol* 2016;**31**(2):125-36 doi:  
34 10.1007/s10654-016-0117-y[published Online First: Epub Date]].  
35  
36  
37 25. Ludvigsson JF, Svedberg P, Olen O, et al. The longitudinal integrated database for health  
38 insurance and labour market studies (LISA) and its use in medical research. *Eur J*  
39 *Epidemiol* 2019;**34**(4):423-37 doi: 10.1007/s10654-019-00511-8[published Online  
40 First: Epub Date]].  
41  
42  
43  
44  
45  
46  
47  
48  
49  
50  
51  
52  
53  
54  
55  
56  
57  
58  
59  
60

- 1  
2  
3 26. Ludvigsson JF, Andersson E, Ekblom A, et al. External review and validation of the  
4  
5 Swedish national inpatient register. *BMC Public Health* 2011;**11**:450 doi:  
6  
7 10.1186/1471-2458-11-450[published Online First: Epub Date]].  
8  
9
- 10 27. MiDAS Sjukpenning och rehabiliteringspenning [The MiDAS register. Sickness absence  
11  
12 benefits] [in Swedish]. The Swedish Social Insurance Agency, 2011.  
13
- 14 28. Angelov N, Johansson P, Lindahl E. Sick of family responsibilities? *Empirical Economics*  
15  
16 2018 doi: 10.1007/s00181-018-1552-2[published Online First: Epub Date]].  
17  
18
- 19 29. Rostila M. The Swedish labour market in the 1990s: the very last of the healthy jobs?  
20  
21 *Scand J Public Health* 2008;**36**(2):126-34 doi: 10.1177/1403494807085067[published  
22  
23 Online First: Epub Date]].  
24  
25
- 26 30. Lidwall U, Bergendorff S, Voss M, et al. Long-term sickness absence: changes in risk  
27  
28 factors and the population at risk. *International journal of occupational medicine and*  
29  
30 *environmental health* 2009;**22**(2):157-68 doi: 10.2478/v10001-009-0018-3[published  
31  
32 Online First: Epub Date]].  
33  
34
- 35 31. Bryngelson A, Mittendorfer-Rutz E, Fritzell J, et al. Reduction in personnel and long-term  
36  
37 sickness absence for psychiatric disorders among employees in Swedish county  
38  
39 councils: an ecological population-based study. *Journal of occupational and*  
40  
41 *environmental medicine* 2011;**53**(6):658-62 doi:  
42  
43 10.1097/JOM.0b013e31821aa706[published Online First: Epub Date]].  
44  
45
- 46 32. Labour Force Surveys: Fourth Quarter 2017. Stockholm, 2017.  
47
- 48 33. Hensing G, Alexanderson K, Allebeck P, et al. How to measure sickness absence?  
49  
50 Literature review and suggestion of five basic measures. *Scand J Soc Med*  
51  
52 1998;**26**(2):133-44  
53  
54  
55  
56  
57  
58  
59  
60

**FIGURE LEGENDS**

Figure 1. Crude mean annual net days of sickness absence (SA) and disability pension (DP) from  $Y_{-3}$  to  $Y_{+3}$ , in Cohort1995, Cohort2000, and Cohort2005, respectively, by childbirth group.

Figure 2. Standardized mean annual net days of sickness absence (SA) and disability pension (DP) from  $Y_{-3}$  to  $Y_{+3}$  in Cohort1995, Cohort2000, and Cohort2005, respectively, by childbirth group.

Figure 3. Crude mean annual net days of sickness absence (SA) and disability pension (DP) from  $Y_{-3}$  to  $Y_{+3}$  in Cohort2005, by age group and childbirth group.

1  
2  
3  
4  
5  
6  
7  
8  
9  
10  
11  
12  
13  
14  
15  
16  
17  
18  
19  
20  
21  
22  
23  
24  
25  
26  
27  
28  
29  
30  
31  
32  
33  
34  
35  
36  
37  
38  
39  
40  
41  
42  
43  
44  
45  
46  
47  
48  
49  
50  
51  
52  
53  
54  
55  
56  
57  
58  
59  
60



\*The vertical lines represent the confidence interval for the sum of SA and DP net days

929x190mm (300 x 300 DPI)

1  
2  
3  
4  
5  
6  
7  
8  
9  
10  
11  
12  
13  
14  
15  
16  
17  
18  
19  
20  
21  
22  
23  
24  
25  
26  
27  
28  
29  
30  
31  
32  
33  
34  
35  
36  
37  
38  
39  
40  
41  
42  
43  
44  
45  
46  
47  
48  
49  
50  
51  
52  
53  
54  
55  
56  
57  
58  
59  
60



\*The vertical lines represent the confidence interval for the sum of SA and DP net days

929x190mm (300 x 300 DPI)

1  
2  
3  
4  
5  
6  
7  
8  
9  
10  
11  
12  
13  
14  
15  
16  
17  
18  
19  
20  
21  
22  
23  
24  
25  
26  
27  
28  
29  
30  
31  
32  
33  
34  
35  
36  
37  
38  
39  
40  
41  
42  
43  
44  
45  
46  
47  
48  
49  
50  
51  
52  
53  
54  
55  
56  
57  
58  
59  
60

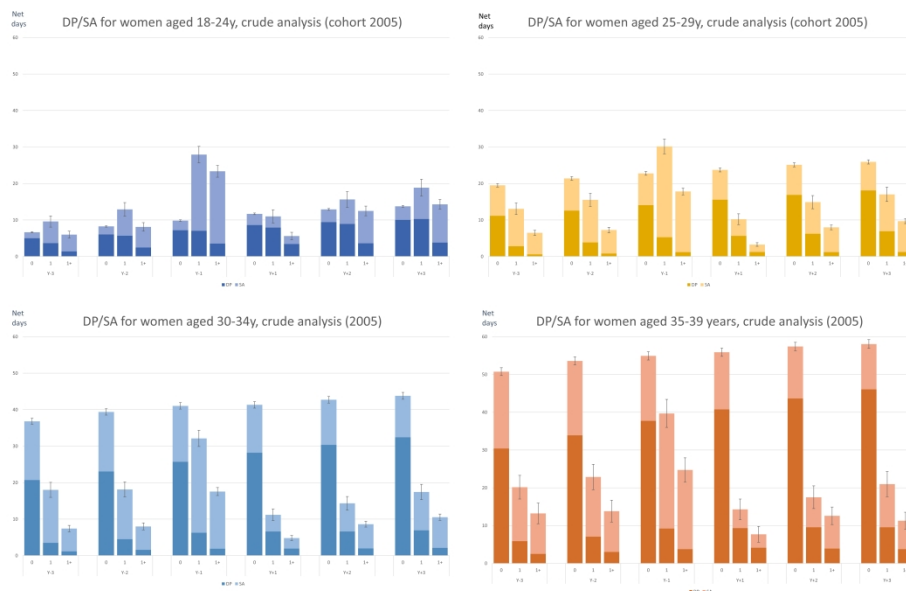

\*The vertical lines represent the confidence interval for the sum of SA and DP net days

603x400mm (300 x 300 DPI)

| STROBE Statement—Checklist of items that should be included in reports of <i>cohort studies</i> |         |                                                                                                                                                                                                   |                    |
|-------------------------------------------------------------------------------------------------|---------|---------------------------------------------------------------------------------------------------------------------------------------------------------------------------------------------------|--------------------|
|                                                                                                 | Item No | Recommendation                                                                                                                                                                                    | Page               |
| <b>Title and abstract</b>                                                                       | 1       | (a) Indicate the study's design with a commonly used term in the title or the abstract                                                                                                            | p. 1, 2            |
|                                                                                                 |         | (b) Provide in the abstract an informative and balanced summary of what was done and what was found                                                                                               | p. 2, 3            |
| <b>Introduction</b>                                                                             |         |                                                                                                                                                                                                   |                    |
| Background/rationale                                                                            | 2       | Explain the scientific background and rationale for the investigation being reported                                                                                                              | p. 4-6             |
| Objectives                                                                                      | 3       | State specific objectives, including any prespecified hypotheses                                                                                                                                  | p. 5-6             |
| <b>Methods</b>                                                                                  |         |                                                                                                                                                                                                   |                    |
| Study design                                                                                    | 4       | Present key elements of study design early in the paper                                                                                                                                           | p. 6-7             |
| Setting                                                                                         | 5       | Describe the setting, locations, and relevant dates, including periods of recruitment, exposure, follow-up, and data collection                                                                   | p. 6-8             |
| Participants                                                                                    | 6       | (a) Give the eligibility criteria, and the sources and methods of selection of participants. Describe methods of follow-up                                                                        | p. 6-8             |
|                                                                                                 |         | (b) For matched studies, give matching criteria and number of exposed and unexposed                                                                                                               | -                  |
| Variables                                                                                       | 7       | Clearly define all outcomes, exposures, predictors, potential confounders, and effect modifiers. Give diagnostic criteria, if applicable                                                          | p. 7, 8            |
| Data sources/<br>measurement                                                                    | 8*      | For each variable of interest, give sources of data and details of methods of assessment (measurement). Describe comparability of assessment methods if there is more than one group              | p. 6-8             |
| Bias                                                                                            | 9       | Describe any efforts to address potential sources of bias                                                                                                                                         | p. 8, 9            |
| Study size                                                                                      | 10      | Explain how the study size was arrived at                                                                                                                                                         | p. 7, 8, 11        |
| Quantitative variables                                                                          | 11      | Explain how quantitative variables were handled in the analyses. If applicable, describe which groupings were chosen and why                                                                      | p. 7-9, 11         |
| Statistical methods                                                                             | 12      | (a) Describe all statistical methods, including those used to control for confounding                                                                                                             | p. 8, 9            |
|                                                                                                 |         | (b) Describe any methods used to examine subgroups and interactions                                                                                                                               | p. 9               |
|                                                                                                 |         | (c) Explain how missing data were addressed                                                                                                                                                       | -                  |
|                                                                                                 |         | (d) If applicable, explain how loss to follow-up was addressed                                                                                                                                    | p. 11              |
|                                                                                                 |         | (e) Describe any sensitivity analyses                                                                                                                                                             | p. 9               |
| <b>Results</b>                                                                                  |         |                                                                                                                                                                                                   |                    |
| Participants                                                                                    | 13*     | (a) Report numbers of individuals at each stage of study—eg numbers potentially eligible, examined for eligibility, confirmed eligible, included in the study, completing follow-up, and analysed | p. 11, 12          |
|                                                                                                 |         | (b) Give reasons for non-participation at each stage                                                                                                                                              | p. 7, 8, 12        |
|                                                                                                 |         | (c) Consider use of a flow diagram                                                                                                                                                                | -                  |
| Descriptive data                                                                                | 14*     | (a) Give characteristics of study participants (eg demographic, clinical, social) and information on exposures and potential confounders                                                          | p. 11              |
|                                                                                                 |         | (b) Indicate number of participants with missing data for each variable of interest                                                                                                               | p. 11              |
|                                                                                                 |         | (c) Summarise follow-up time (eg, average and total amount)                                                                                                                                       | -                  |
| Outcome data                                                                                    | 15*     | Report numbers of outcome events or summary measures over time                                                                                                                                    | p. 12, Figures 1-3 |
| Main results                                                                                    | 16      | (a) Give unadjusted estimates and, if applicable, confounder-adjusted                                                                                                                             | Figures 1-3        |

|                          |    |                                                                                                                                                                            |          |
|--------------------------|----|----------------------------------------------------------------------------------------------------------------------------------------------------------------------------|----------|
|                          |    | estimates and their precision (eg, 95% confidence interval). Make clear which confounders were adjusted for and why they were included                                     |          |
|                          |    | (b) Report category boundaries when continuous variables were categorized                                                                                                  | p. 8, 11 |
|                          |    | (c) If relevant, consider translating estimates of relative risk into absolute risk for a meaningful time period                                                           | -        |
| Other analyses           | 17 | Report other analyses done—eg analyses of subgroups and interactions, and sensitivity analyses                                                                             | p. 13    |
| <b>Discussion</b>        |    |                                                                                                                                                                            |          |
| Key results              | 18 | Summarise key results with reference to study objectives                                                                                                                   | p. 13-14 |
| Limitations              | 19 | Discuss limitations of the study, taking into account sources of potential bias or imprecision. Discuss both direction and magnitude of any potential bias                 | p. 16-17 |
| Interpretation           | 20 | Give a cautious overall interpretation of results considering objectives, limitations, multiplicity of analyses, results from similar studies, and other relevant evidence | p. 13-17 |
| Generalisability         | 21 | Discuss the generalisability (external validity) of the study results                                                                                                      | p. 16    |
| <b>Other information</b> |    |                                                                                                                                                                            |          |
| Funding                  | 22 | Give the source of funding and the role of the funders for the present study and, if applicable, for the original study on which the present article is based              | p. 18    |

\*Give information separately for exposed and unexposed groups.

**Note:** An Explanation and Elaboration article discusses each checklist item and gives methodological background and published examples of transparent reporting. The STROBE checklist is best used in conjunction with this article (freely available on the Web sites of PLoS Medicine at <http://www.plosmedicine.org/>, Annals of Internal Medicine at <http://www.annals.org/>, and Epidemiology at <http://www.epidem.com/>). Information on the STROBE Initiative is available at <http://www.strobe-statement.org>.
